# Supplementary material for: Comparison of buckwheat, red clover, and purple tansy as potential surrogate plants for use in semi-field pesticide risk assessments with Bombus impatiens
Source: PeerJ. 2016 Jul 14;4:e2228. doi: 10.7717/peerj.2228 (PMC4950535; doi:10.7717/peerj.2228)
Supplement: Data S1 — Raw data on Bombus impatiens foraging activity and colony development (numbers of individuals per colony and colony weight) on small plots of flowering buckwheat, red clover, and purple tansy. [file peerj-04-2228-s002.xlsx]

## Sheet: Foraging Activity and Weights
Table 1. Bombus impatiens foraging activity (number of workers actively foraging from flowers and entering or exiting the colony) and environmental conditions (temperature, humidty, and cloud cover) on plots of flowering buckwheat, red clover, and purple tansy. Colonies were confined to plots (one colony per plot) for 16 days and then maintained in a growth cabinet until 2 weeks after the first e…
Date	Treatment	Plot	Time	Temperature (⁰C)	% Humidity	#Active Foragers on Plot	#Entering or Exiting Colony/10 min	Observer	Colony Weight (g)	Weather	Notes
2015-07-23	Buckwheat	1	NA	NA	NA	NA	NA	NA	548	NA	colonies received
2015-07-23	Buckwheat	2	NA	NA	NA	NA	NA	NA	563	NA	colonies received
2015-07-23	Buckwheat	3	NA	NA	NA	NA	NA	NA	558	NA	colonies received
2015-07-23	Buckwheat	4	NA	NA	NA	NA	NA	NA	557	NA	colonies received
2015-07-23	Buckwheat	5	NA	NA	NA	NA	NA	NA	564	NA	colonies received
2015-07-23	Buckwheat	6	NA	NA	NA	NA	NA	NA	553	NA	colonies received
2015-07-23	Buckwheat	7	NA	NA	NA	NA	NA	NA	557	NA	colonies received
2015-07-23	Buckwheat	8	NA	NA	NA	NA	NA	NA	558	NA	colonies received
2015-07-23	Buckwheat	9	NA	NA	NA	NA	NA	NA	561	NA	colonies received
2015-07-23	Buckwheat	10	NA	NA	NA	NA	NA	NA	552	NA	colonies received
2015-07-24	Buckwheat	1	09:15:00	23.7	46	8	12	AG	539	sunny	NA
2015-07-24	Buckwheat	1	10:32:00	29.1	39	5	3	PL	NA	sunny	NA
2015-07-24	Buckwheat	2	08:55:00	23.7	41	6	8	AG	552	sunny	NA
2015-07-24	Buckwheat	2	10:36:00	NA	NA	2	3	TC	NA	sunny	NA
2015-07-24	Buckwheat	3	08:56:00	24	39	3	2	KH	548	sunny	NA
2015-07-24	Buckwheat	3	10:54:00	NA	NA	0	1	TC	NA	sunny	NA
2015-07-24	Buckwheat	4	09:19:00	25	42	1	1	TC	547	sunny	NA
2015-07-24	Buckwheat	4	10:50:00	32.8	37	1	0	TC	NA	sunny	NA
2015-07-24	Buckwheat	5	09:13:00	23.3	42	2	4	KH	554	sunny	NA
2015-07-24	Buckwheat	5	10:34:00	27.1	40	0	0	AG	NA	sunny	NA
2015-07-24	Buckwheat	6	09:01:00	34	37	5	10	TC	543	sunny	NA
2015-07-24	Buckwheat	6	11:06:00	32.5	37	4	1	PL	NA	sunny	NA
2015-07-24	Buckwheat	7	09:28:00	24.8	46	1	0	KH	550	sunny	NA
2015-07-24	Buckwheat	7	10:47:00	27.4	41	1	0	AG	NA	sunny	NA
2015-07-24	Buckwheat	8	08:56:00	NA	NA	9	4	PL	550	sunny	NA
2015-07-24	Buckwheat	8	11:02:00	29.4	38	2	2	AG	NA	sunny	NA
2015-07-24	Buckwheat	9	09:28:00	NA	NA	0	0	PL	543	sunny	NA
2015-07-24	Buckwheat	9	10:53:00	27.8	38	0	0	KH	NA	sunny	NA
2015-07-24	Buckwheat	10	09:14:00	NA	NA	3	2	PL	545	sunny	NA
2015-07-24	Buckwheat	10	10:37:00	29.2	37	0	0	KH	NA	sunny	NA
2015-07-27	Buckwheat	1	08:39:00	NA	NA	16	17	TC	523	sunny	NA
2015-07-27	Buckwheat	1	10:33:00	30.7	58	8	9	AG	NA	sunny	NA
2015-07-27	Buckwheat	2	08:55:00	NA	NA	15	11	TC	539	sunny	NA
2015-07-27	Buckwheat	2	10:36:00	32.6	50	6	4	KH	NA	sunny	NA
2015-07-27	Buckwheat	3	08:39:00	26.9	55	19	19	KH	527	sunny	NA
2015-07-27	Buckwheat	3	10:48:00	32.8	55	6	3	AG	NA	sunny	NA
2015-07-27	Buckwheat	4	09:14:00	NA	NA	17	19	TC	531	sunny	NA
2015-07-27	Buckwheat	4	10:52:00	32.1	54	6	2	KH	NA	sunny	NA
2015-07-27	Buckwheat	5	08:24:00	26.1	60	13	6	KH	535	sunny	NA
2015-07-27	Buckwheat	5	11:07:00	37.8	44	12	3	PL	NA	sunny	NA
2015-07-27	Buckwheat	6	08:38:00	34.7	47	27	8	PL	523	sunny	NA
2015-07-27	Buckwheat	6	11:09:00	32.8	51	4	7	KH	NA	sunny	NA
2015-07-27	Buckwheat	7	09:09:00	27.8	62	1	3	KH	532	sunny	NA
2015-07-27	Buckwheat	7	10:34:00	35.8	56	5	3	PL	NA	sunny	NA
2015-07-27	Buckwheat	8	08:54:00	36.8	47	23	14	PL	532	sunny	NA
2015-07-27	Buckwheat	8	10:50:00	35.7	51	5	2	PL	NA	sunny	NA
2015-07-27	Buckwheat	9	08:55:00	27.1	60	14	8	AG	535	sunny	NA
2015-07-27	Buckwheat	9	10:57:00	NA	NA	4	5	TC	NA	sunny	NA
2015-07-27	Buckwheat	10	08:39:00	26.1	55	7	4	AG	536	sunny	NA
2015-07-27	Buckwheat	10	10:40:00	NA	NA	3	5	TC	NA	sunny	NA
2015-07-29	Buckwheat	1	09:03:00	27.6	64	18	31	KH	NA	sunny	NA
2015-07-29	Buckwheat	1	10:39:00	NA	NA	15	9	LS	NA	sunny	NA
2015-07-29	Buckwheat	2	09:20:00	27.1	67	14	15	KH	NA	sunny	NA
2015-07-29	Buckwheat	2	10:56:00	NA	NA	12	33	LS	NA	sunny	NA
2015-07-29	Buckwheat	3	09:06:00	28.1	52	8	19	TC	NA	sunny	NA
2015-07-29	Buckwheat	3	11:14:00	NA	NA	8	8	LS	NA	sunny	NA
2015-07-29	Buckwheat	4	09:38:00	28.6	64	18	18	KH	NA	sunny	NA
2015-07-29	Buckwheat	4	11:25:00	30.8	62	7	5	AG	NA	sunny	NA
2015-07-29	Buckwheat	5	09:25:00	27.3	61	20	3	TC	NA	sunny	NA
2015-07-29	Buckwheat	5	10:54:00	30.3	57	18	12	AG	NA	sunny	NA
2015-07-29	Buckwheat	6	09:53:00	28.6	64	17	19	KH	NA	sunny	NA
2015-07-29	Buckwheat	6	10:39:00	32.2	51	13	18	AG	NA	sunny	NA
2015-07-29	Buckwheat	7	10:10:00	29.7	67	12	9	KH	NA	sunny	NA
2015-07-29	Buckwheat	7	11:10:00	30.8	60	7	4	AG	NA	sunny	NA
2015-07-29	Buckwheat	8	09:43:00	28.8	64	14	20	TC	NA	sunny	NA
2015-07-29	Buckwheat	8	10:44:00	29.8	62	15	9	PL	NA	sunny	NA
2015-07-29	Buckwheat	9	10:02:00	28.3	66	24	19	TC	NA	sunny	NA
2015-07-29	Buckwheat	9	11:00:00	30.6	62	25	10	PL	NA	sunny	NA
2015-07-29	Buckwheat	10	10:09:00	32.1	59	7	6	PL	NA	sunny	NA
2015-07-29	Buckwheat	10	11:15:00	33.4	57	10	5	PL	NA	sunny	NA
2015-07-31	Buckwheat	1	09:00:00	25.3	51	11	33	KH	520	sunny	NA
2015-07-31	Buckwheat	1	11:51:00	31.2	49	14	38	AG	NA	sunny	NA
2015-07-31	Buckwheat	2	09:19:00	24.8	55	10	9	KH	526	sunny	NA
2015-07-31	Buckwheat	2	11:43:00	30.1	36	18	12	JW	NA	sunny	NA
2015-07-31	Buckwheat	3	09:00:00	25.3	52	18	19	PL	524	sunny	NA
2015-07-31	Buckwheat	3	11:59:00	29.8	32	14	24	JW	NA	sunny	NA
2015-07-31	Buckwheat	4	09:36:00	25.8	62	11	22	KH	521	sunny	NA
2015-07-31	Buckwheat	4	12:06:00	28.6	47	7	13	AG	NA	sunny	NA
2015-07-31	Buckwheat	5	09:15:00	27.5	54	29	14	PL	537	sunny	NA
2015-07-31	Buckwheat	5	12:15:00	30.5	33	22	7	JW	NA	sunny	NA
2015-07-31	Buckwheat	6	09:51:00	31.2	59	17	27	KH	518	sunny	NA
2015-07-31	Buckwheat	6	12:19:00	29.2	50	12	18	AG	NA	sunny	NA
2015-07-31	Buckwheat	7	10:06:00	27	57	12	8	KH	524	sunny	NA
2015-07-31	Buckwheat	7	12:30:00	28.6	40	12	5	JW	NA	sunny	NA
2015-07-31	Buckwheat	8	09:32:00	28.4	51	23	19	PL	522	sunny	NA
2015-07-31	Buckwheat	8	12:34:00	28.9	50	13	5	AG	NA	sunny	NA
2015-07-31	Buckwheat	9	09:50:00	30.7	49	25	13	PL	533	sunny	NA
2015-07-31	Buckwheat	9	12:45:00	NA	NA	12	8	KH	NA	sunny	NA
2015-07-31	Buckwheat	10	10:06:00	33.8	46	13	7	PL	532	sunny	NA
2015-07-31	Buckwheat	10	12:47:00	31.1	42	6	4	JW	NA	sunny	NA
2015-08-03	Buckwheat	1	10:40:00	NA	NA	12	14	AF	521	cloudy	NA
2015-08-03	Buckwheat	1	12:52:00	33.7	42	22	38	PL	NA	cloudy	NA
2015-08-03	Buckwheat	2	10:54:00	NA	NA	12	8	AF	534	cloudy	NA
2015-08-03	Buckwheat	2	13:08:00	33.4	42	23	15	PL	NA	cloudy	NA
2015-08-03	Buckwheat	3	11:09:00	NA	NA	15	22	AF	527	cloudy	NA
2015-08-03	Buckwheat	3	12:51:00	NA	NA	9	15	KH	NA	cloudy	NA
2015-08-03	Buckwheat	4	10:22:00	NA	NA	11	7	AF	520	cloudy	NA
2015-08-03	Buckwheat	4	13:24:00	34.2	41	5	9	PL	NA	cloudy	NA
2015-08-03	Buckwheat	5	10:23:00	23.9	67	23	14	AG	533	cloudy	NA
2015-08-03	Buckwheat	5	13:09:00	NA	NA	21	10	KH	NA	cloudy	NA
2015-08-03	Buckwheat	6	11:22:00	NA	NA	13	20	AF	520	cloudy	NA
2015-08-03	Buckwheat	6	13:39:00	33	43	19	14	PL	NA	cloudy	NA
2015-08-03	Buckwheat	7	11:23:00	25.5	65	8	9	AG	528	cloudy	NA
2015-08-03	Buckwheat	7	13:25:00	NA	NA	9	8	KH	NA	cloudy	NA
2015-08-03	Buckwheat	8	11:11:00	24.9	65	13	22	AG	525	cloudy	NA
2015-08-03	Buckwheat	8	13:56:00	34.4	42	20	15	PL	NA	cloudy	NA
2015-08-03	Buckwheat	9	10:40:00	23.4	66	5	6	AG	533	cloudy	NA
2015-08-03	Buckwheat	9	13:39:00	NA	NA	18	12	KH	NA	cloudy	NA
2015-08-03	Buckwheat	10	10:55:00	24.4	67	7	5	AG	534	cloudy	NA
2015-08-03	Buckwheat	10	13:40:00	NA	NA	8	4	LS	NA	cloudy	NA
2015-08-05	Buckwheat	1	08:55:00	24.1	41	10	20	KH	NA	sunny	NA
2015-08-05	Buckwheat	1	10:48:00	NA	NA	10	45	TC	NA	sunny	NA
2015-08-05	Buckwheat	2	09:10:00	25.1	43	8	14	KH	NA	sunny	NA
2015-08-05	Buckwheat	2	11:05:00	NA	NA	14	7	TC	NA	sunny	NA
2015-08-05	Buckwheat	3	09:24:00	22.5	45	6	18	KH	NA	sunny	NA
2015-08-05	Buckwheat	3	10:47:00	28.1	50	22	24	PL	NA	sunny	NA
2015-08-05	Buckwheat	4	08:54:00	21.4	67	3	5	AG	NA	sunny	NA
2015-08-05	Buckwheat	4	11:03:00	26.4	52	18	15	PL	NA	sunny	NA
2015-08-05	Buckwheat	5	09:40:00	25.1	43	17	14	KH	NA	sunny	NA
2015-08-05	Buckwheat	5	11:21:00	NA	NA	22	14	TC	NA	sunny	NA
2015-08-05	Buckwheat	6	09:55:00	25.1	41	17	31	KH	NA	sunny	NA
2015-08-05	Buckwheat	6	11:18:00	27.8	51	29	35	PL	NA	sunny	NA
2015-08-05	Buckwheat	7	09:07:00	21.1	67	10	20	AG	NA	sunny	NA
2015-08-05	Buckwheat	7	11:36:00	NA	NA	14	7	TC	NA	sunny	NA
2015-08-05	Buckwheat	8	09:22:00	21.4	67	12	13	AG	NA	sunny	NA
2015-08-05	Buckwheat	8	11:35:00	28.1	50	25	22	PL	NA	sunny	NA
2015-08-05	Buckwheat	9	09:54:00	21.2	67	15	25	AG	NA	sunny	NA
2015-08-05	Buckwheat	9	11:52:00	28.7	48	32	11	PL	NA	sunny	NA
2015-08-05	Buckwheat	10	09:40:00	21.8	67	8	5	AG	NA	sunny	NA
2015-08-05	Buckwheat	10	11:53:00	NA	NA	9	9	TC	NA	sunny	NA
2015-08-07	Buckwheat	1	10:38:00	30.1	31	13	17	KH	521	sunny	NA
2015-08-07	Buckwheat	1	12:58:00	32	NA	10	35	TC	NA	sunny	NA
2015-08-07	Buckwheat	2	10:25:00	28.9	36	8	12	KH	529	sunny	NA
2015-08-07	Buckwheat	2	13:19:00	28.5	NA	8	23	TC	NA	sunny	NA
2015-08-07	Buckwheat	3	10:27:00	26.6	54	9	17	AG	524	sunny	NA
2015-08-07	Buckwheat	3	13:35:00	30.9	NA	4	6	TC	NA	sunny	NA
2015-08-07	Buckwheat	4	10:13:00	24.6	54	10	11	AG	524	sunny	NA
2015-08-07	Buckwheat	4	12:25:00	26.9	NA	13	11	TC	NA	sunny	NA
2015-08-07	Buckwheat	5	08:51:00	25.8	44	22	28	KH	531	sunny	NA
2015-08-07	Buckwheat	5	13:18:00	29.1	39	35	29	PL	NA	sunny	NA
2015-08-07	Buckwheat	6	09:08:00	26.6	43	20	24	KH	518	sunny	NA
2015-08-07	Buckwheat	6	12:41:00	31.6	NA	14	39	TC	NA	sunny	NA
2015-08-07	Buckwheat	7	09:37:00	27.5	35	10	8	KH	529	sunny	NA
2015-08-07	Buckwheat	7	13:05:00	32.1	40	25	15	PL	NA	sunny	NA
2015-08-07	Buckwheat	8	09:23:00	24.3	43	16	7	KH	524	sunny	NA
2015-08-07	Buckwheat	8	12:51:00	32.9	39	23	19	PL	NA	sunny	NA
2015-08-07	Buckwheat	9	10:09:00	26.1	42	25	13	KH	530	sunny	NA
2015-08-07	Buckwheat	9	12:37:00	34.1	40	27	14	PL	NA	sunny	NA
2015-08-07	Buckwheat	10	09:55:00	29.6	35	12	10	KH	529	sunny	NA
2015-08-07	Buckwheat	10	12:22:00	31	39	16	10	PL	NA	sunny	NA
2015-07-28	Red Clover	1	NA	NA	NA	NA	NA	NA	511	NA	colonies received
2015-07-28	Red Clover	2	NA	NA	NA	NA	NA	NA	494	NA	colonies received
2015-07-28	Red Clover	3	NA	NA	NA	NA	NA	NA	512	NA	colonies received
2015-07-28	Red Clover	4	NA	NA	NA	NA	NA	NA	511	NA	colonies received
2015-07-28	Red Clover	5	NA	NA	NA	NA	NA	NA	503	NA	colonies received
2015-07-28	Red Clover	6	NA	NA	NA	NA	NA	NA	510	NA	colonies received
2015-07-28	Red Clover	7	NA	NA	NA	NA	NA	NA	506	NA	colonies received
2015-07-28	Red Clover	8	NA	NA	NA	NA	NA	NA	507	NA	colonies received
2015-07-28	Red Clover	9	NA	NA	NA	NA	NA	NA	513	NA	colonies received
2015-07-28	Red Clover	10	NA	NA	NA	NA	NA	NA	511	NA	colonies received
2015-07-29	Red Clover	1	09:04:00	27.8	68	5	11	AG	NA	sunny	NA
2015-07-29	Red Clover	1	10:44:00	29.9	69	3	2	TC	NA	sunny	NA
2015-07-29	Red Clover	2	09:27:00	29.9	67	2	0	AG	NA	sunny	NA
2015-07-29	Red Clover	2	11:02:00	30.8	67	3	3	TC	NA	sunny	NA
2015-07-29	Red Clover	3	09:49:00	NA	NA	1	0	LS	NA	sunny	NA
2015-07-29	Red Clover	3	10:43:00	32.4	57	0	0	KH	NA	sunny	NA
2015-07-29	Red Clover	4	09:34:00	NA	NA	1	2	LS	NA	sunny	NA
2015-07-29	Red Clover	4	11:00:00	34.7	55	1	0	KH	NA	sunny	NA
2015-07-29	Red Clover	5	09:21:00	NA	NA	1	1	LS	NA	sunny	NA
2015-07-29	Red Clover	5	11:22:00	31.1	68	0	2	TC	NA	sunny	NA
2015-07-29	Red Clover	6	09:04:00	NA	NA	2	1	LS	NA	sunny	NA
2015-07-29	Red Clover	6	11:16:00	33.5	55	2	2	KH	NA	sunny	NA
2015-07-29	Red Clover	7	09:40:00	33	54	2	3	PL	NA	sunny	NA
2015-07-29	Red Clover	7	11:39:00	29.5	73	2	1	TC	NA	sunny	NA
2015-07-29	Red Clover	8	09:05:00	28.2	54	14	3	PL	NA	sunny	NA
2015-07-29	Red Clover	8	11:37:00	34.2	54	4	2	KH	NA	sunny	NA
2015-07-29	Red Clover	9	09:43:00	NA	NA	4	2	AG	NA	sunny	NA
2015-07-29	Red Clover	9	11:47:00	NA	NA	4	0	LS	NA	sunny	NA
2015-07-29	Red Clover	10	09:24:00	28.8	61	0	2	PL	NA	sunny	NA
2015-07-29	Red Clover	10	11:32:00	NA	NA	1	0	LS	NA	sunny	NA
2015-07-31	Red Clover	1	10:15:00	28.6	46	4	8	JW	483	sunny	NA
2015-07-31	Red Clover	1	11:53:00	29.9	54	4	7	KH	NA	sunny	NA
2015-07-31	Red Clover	2	10:15:00	NA	NA	7	1	AG	473	sunny	NA
2015-07-31	Red Clover	2	12:12:00	32.1	49	3	1	KH	NA	sunny	NA
2015-07-31	Red Clover	3	09:05:00	26.9	51	1	0	JW	492	sunny	NA
2015-07-31	Red Clover	3	12:31:00	NA	NA	2	0	LS	NA	sunny	NA
2015-07-31	Red Clover	4	09:24:00	27.7	53	4	0	AG	484	sunny	NA
2015-07-31	Red Clover	4	12:29:00	31.9	47	6	6	KH	NA	sunny	NA
2015-07-31	Red Clover	5	09:06:00	25.8	51	5	6	AG	481	sunny	NA
2015-07-31	Red Clover	5	12:26:00	36.8	42	6	2	PL	NA	sunny	NA
2015-07-31	Red Clover	6	09:24:00	29.4	45	6	2	JW	482	sunny	NA
2015-07-31	Red Clover	6	12:00:00	NA	NA	8	5	LS	NA	sunny	NA
2015-07-31	Red Clover	7	09:38:00	26.1	57	3	2	AG	481	sunny	NA
2015-07-31	Red Clover	7	12:15:00	NA	NA	6	0	LS	NA	sunny	NA
2015-07-31	Red Clover	8	09:40:00	30.8	41	8	7	JW	478	sunny	NA
2015-07-31	Red Clover	8	11:45:00	NA	NA	9	6	LS	NA	sunny	NA
2015-07-31	Red Clover	9	09:54:00	27	60	9	4	AG	487	sunny	NA
2015-07-31	Red Clover	9	12:10:00	33.6	44	14	4	PL	NA	sunny	NA
2015-07-31	Red Clover	10	09:55:00	28.3	47	4	2	JW	487	sunny	NA
2015-07-31	Red Clover	10	11:54:00	33.5	44	3	4	PL	NA	sunny	NA
2015-08-03	Red Clover	1	10:23:00	26.5	68	3	3	PL	470	cloudy	NA
2015-08-03	Red Clover	1	12:52:00	NA	NA	3	13	AF	NA	cloudy	NA
2015-08-03	Red Clover	2	10:40:00	28.8	63	2	5	PL	460	cloudy	NA
2015-08-03	Red Clover	2	13:05:00	NA	NA	4	2	AF	NA	cloudy	NA
2015-08-03	Red Clover	3	12:52:00	27.8	58	3	3	AG	470	cloudy	NA
2015-08-03	Red Clover	3	13:22:00	NA	NA	5	0	AF	NA	cloudy	NA
2015-08-03	Red Clover	4	10:55:00	30.5	62	2	3	PL	470	cloudy	NA
2015-08-03	Red Clover	4	13:21:00	32.5	56	3	2	AG	NA	cloudy	NA
2015-08-03	Red Clover	5	10:42:00	NA	NA	1	2	KH	466	cloudy	NA
2015-08-03	Red Clover	5	13:07:00	30.5	58	1	2	AG	NA	cloudy	NA
2015-08-03	Red Clover	6	11:11:00	30.9	59	5	3	PL	471	cloudy	NA
2015-08-03	Red Clover	6	13:36:00	30	59	6	4	AG	NA	cloudy	NA
2015-08-03	Red Clover	7	10:56:00	NA	NA	1	3	KH	469	cloudy	NA
2015-08-03	Red Clover	7	12:54:00	NA	NA	2	1	LS	NA	cloudy	NA
2015-08-03	Red Clover	8	11:25:00	29.9	57	5	6	PL	466	cloudy	NA
2015-08-03	Red Clover	8	13:23:00	NA	NA	5	4	LS	NA	cloudy	NA
2015-08-03	Red Clover	9	11:09:00	NA	NA	6	10	KH	471	cloudy	NA
2015-08-03	Red Clover	9	13:08:00	NA	NA	10	12	LS	NA	cloudy	NA
2015-08-03	Red Clover	10	11:23:00	NA	NA	2	3	KH	467	cloudy	NA
2015-08-03	Red Clover	10	13:36:00	NA	NA	4	5	AF	NA	cloudy	NA
2015-08-05	Red Clover	1	08:54:00	25.2	62	2	2	PL	NA	sunny	NA
2015-08-05	Red Clover	1	10:47:00	25.2	60	1	2	AG	NA	sunny	NA
2015-08-05	Red Clover	2	09:09:00	33.1	56	4	4	PL	NA	sunny	NA
2015-08-05	Red Clover	2	11:03:00	24.5	60	3	1	AG	NA	sunny	NA
2015-08-05	Red Clover	3	08:59:00	NA	NA	3	0	TC	NA	sunny	NA
2015-08-05	Red Clover	3	11:19:00	26.1	62	3	0	AG	NA	sunny	NA
2015-08-05	Red Clover	4	09:17:00	NA	NA	1	1	TC	NA	sunny	NA
2015-08-05	Red Clover	4	10:48:00	31.9	33	2	0	KH	NA	sunny	NA
2015-08-05	Red Clover	5	09:25:00	27.2	53	2	1	PL	NA	sunny	NA
2015-08-05	Red Clover	5	11:03:00	28.4	41	2	2	KH	NA	sunny	NA
2015-08-05	Red Clover	6	09:32:00	NA	NA	4	6	TC	NA	sunny	NA
2015-08-05	Red Clover	6	11:34:00	24.5	62	4	1	AG	NA	sunny	NA
2015-08-05	Red Clover	7	09:39:00	25.2	56	6	3	PL	NA	sunny	NA
2015-08-05	Red Clover	7	11:21:00	29	40	3	1	KH	NA	sunny	NA
2015-08-05	Red Clover	8	09:48:00	NA	NA	4	8	TC	NA	sunny	NA
2015-08-05	Red Clover	8	11:47:00	25.4	63	3	5	AG	NA	sunny	NA
2015-08-05	Red Clover	9	10:03:00	NA	NA	2	13	TC	NA	sunny	NA
2015-08-05	Red Clover	9	11:35:00	30.6	33	3	5	KH	NA	sunny	NA
2015-08-05	Red Clover	10	09:54:00	25.9	57	3	5	PL	NA	sunny	NA
2015-08-05	Red Clover	10	11:50:00	30.6	33	3	0	KH	NA	sunny	NA
2015-08-07	Red Clover	1	08:53:00	21.5	56	2	1	AG	461	sunny	NA
2015-08-07	Red Clover	1	13:51:00	29.4	NA	4	0	TC	NA	sunny	NA
2015-08-07	Red Clover	2	09:06:00	22.7	58	4	3	AG	449	sunny	NA
2015-08-07	Red Clover	2	12:21:00	NA	NA	4	3	KH	NA	sunny	NA
2015-08-07	Red Clover	3	09:21:00	23.3	59	3	4	AG	458	sunny	NA
2015-08-07	Red Clover	3	12:38:00	31.1	NA	1	0	KH	NA	sunny	NA
2015-08-07	Red Clover	4	09:36:00	29	60	3	0	AG	460	sunny	NA
2015-08-07	Red Clover	4	13:40:00	35	40	8	3	PL	NA	sunny	NA
2015-08-07	Red Clover	5	09:49:00	26.6	55	6	2	PL	459	sunny	NA
2015-08-07	Red Clover	5	12:52:00	30.9	NA	1	2	KH	NA	sunny	NA
2015-08-07	Red Clover	6	09:51:00	NA	NA	6	3	AG	464	sunny	NA
2015-08-07	Red Clover	6	13:06:00	29.6	NA	5	7	KH	NA	sunny	NA
2015-08-07	Red Clover	7	09:36:00	25.9	57	5	4	PL	464	sunny	NA
2015-08-07	Red Clover	7	NA	NA	NA	NA	NA	NA	NA	sunny	NA
2015-08-07	Red Clover	8	09:08:00	24.5	56	7	2	PL	462	sunny	NA
2015-08-07	Red Clover	8	13:22:00	26.6	NA	9	9	KH	NA	sunny	NA
2015-08-07	Red Clover	9	09:22:00	25.9	56	12	0	PL	459	sunny	NA
2015-08-07	Red Clover	9	11:39:00	26.4	54	4	3	LS	NA	sunny	NA
2015-08-07	Red Clover	10	08:55:00	23.5	55	3	0	PL	457	sunny	NA
2015-08-07	Red Clover	10	13:38:00	30.1	NA	8	5	KH	NA	sunny	NA
2015-08-10	Red Clover	1	08:28:00	20.1	65	1	1	AG	463	cloudy	NA
2015-08-10	Red Clover	1	10:57:00	28.8	57	6	3	PL	NA	cloudy	NA
2015-08-10	Red Clover	2	08:41:00	20.5	67	2	0	AG	451	cloudy	NA
2015-08-10	Red Clover	2	11:12:00	31.5	56	8	11	Pl	NA	cloudy	NA
2015-08-10	Red Clover	3	08:56:00	21.1	69	2	1	AG	460	cloudy	NA
2015-08-10	Red Clover	3	11:27:00	31.2	56	8	4	PL	NA	cloudy	NA
2015-08-10	Red Clover	4	09:10:00	22.8	70	2	2	AG	458	cloudy	foundress queen dead
2015-08-10	Red Clover	4	10:58:00	27.9	42	3	7	KH	NA	cloudy	NA
2015-08-10	Red Clover	5	09:26:00	23.5	69	1	1	AG	458	cloudy	NA
2015-08-10	Red Clover	5	11:13:00	30.9	38	2	4	KH	NA	cloudy	NA
2015-08-10	Red Clover	6	09:12:00	23.6	NA	4	0	TC	464	cloudy	NA
2015-08-10	Red Clover	6	11:26:00	29.4	45	4	12	KH	NA	cloudy	NA
2015-08-10	Red Clover	7	09:27:00	25.5	NA	6	2	TC	466	cloudy	NA
2015-08-10	Red Clover	7	11:40:00	29.1	50	5	5	KH	NA	cloudy	NA
2015-08-10	Red Clover	8	08:32:00	21.1	NA	4	1	TC	460	cloudy	NA
2015-08-10	Red Clover	8	10:57:00	26.4	64	8	10	LS	NA	cloudy	NA
2015-08-10	Red Clover	9	08:56:00	23.1	NA	6	1	TC	458	cloudy	NA
2015-08-10	Red Clover	9	11:11:00	26.4	69	7	21	LS	NA	cloudy	NA
2015-08-10	Red Clover	10	09:43:00	24.9	NA	7	4	TC	390	cloudy	NA
2015-08-10	Red Clover	10	11:26:00	26.8	72	8	4	LS	NA	cloudy	NA
2015-08-12	Red Clover	1	09:19:00	23.1	65	7	1	PL	NA	cloudy	NA
2015-08-12	Red Clover	1	10:41:00	22.5	NA	2	2	TC	NA	cloudy	NA
2015-08-12	Red Clover	2	09:34:00	23.8	64	4	0	PL	NA	cloudy	NA
2015-08-12	Red Clover	2	10:56:00	24.4	NA	2	2	TC	NA	cloudy	NA
2015-08-12	Red Clover	3	09:48:00	23.8	64	10	1	PL	NA	cloudy	NA
2015-08-12	Red Clover	3	11:12:00	23.1	NA	4	1	TC	NA	cloudy	NA
2015-08-12	Red Clover	4	10:15:00	23.6	64	3	0	PL	NA	cloudy	NA
2015-08-12	Red Clover	4	11:40:00	25.1	NA	3	0	TC	NA	cloudy	NA
2015-08-12	Red Clover	5	10:01:00	21.8	65	4	1	PL	NA	cloudy	NA
2015-08-12	Red Clover	5	11:26:00	24.8	NA	4	1	TC	NA	cloudy	NA
2015-08-12	Red Clover	6	10:18:00	22.3	52	3	3	KH	NA	cloudy	NA
2015-08-12	Red Clover	6	11:37:00	24.3	63	3	1	AG	NA	cloudy	NA
2015-08-12	Red Clover	7	09:50:00	22.3	59	2	2	KH	NA	cloudy	NA
2015-08-12	Red Clover	7	11:20:00	23.6	67	4	2	AG	NA	cloudy	NA
2015-08-12	Red Clover	8	10:03:00	21.4	54	3	1	KH	NA	cloudy	NA
2015-08-12	Red Clover	8	10:53:00	23.8	65	8	3	AG	NA	cloudy	NA
2015-08-12	Red Clover	9	09:36:00	NA	NA	4	1	KH	NA	cloudy	NA
2015-08-12	Red Clover	9	11:06:00	23.2	65	6	6	AG	NA	cloudy	NA
2015-08-12	Red Clover	10	09:21:00	NA	NA	3	1	KH	NA	cloudy	NA
2015-08-12	Red Clover	10	10:39:00	22.1	64	11	2	AG	NA	cloudy	NA
2015-08-06	Purple Tansy	1	NA	NA	NA	NA	NA	NA	499	NA	colonies received
2015-08-06	Purple Tansy	2	NA	NA	NA	NA	NA	NA	493	NA	colonies received
2015-08-06	Purple Tansy	3	NA	NA	NA	NA	NA	NA	487	NA	colonies received
2015-08-06	Purple Tansy	4	NA	NA	NA	NA	NA	NA	494	NA	colonies received
2015-08-06	Purple Tansy	5	NA	NA	NA	NA	NA	NA	484	NA	colonies received
2015-08-06	Purple Tansy	6	NA	NA	NA	NA	NA	NA	480	NA	colonies received
2015-08-06	Purple Tansy	7	NA	NA	NA	NA	NA	NA	482	NA	colonies received
2015-08-06	Purple Tansy	8	NA	NA	NA	NA	NA	NA	484	NA	colonies received
2015-08-06	Purple Tansy	9	NA	NA	NA	NA	NA	NA	490	NA	colonies received
2015-08-06	Purple Tansy	10	NA	NA	NA	NA	NA	NA	488	NA	colonies received
2015-08-07	Purple Tansy	1	08:53:00	22.2	NA	2	2	TC	491	sunny	NA
2015-08-07	Purple Tansy	1	12:51:00	27.1	50	9	2	LS	NA	sunny	NA
2015-08-07	Purple Tansy	2	09:09:00	21.9	NA	2	0	TC	488	sunny	NA
2015-08-07	Purple Tansy	2	12:36:00	28.4	49	6	2	LS	NA	sunny	NA
2015-08-07	Purple Tansy	3	09:25:00	22.9	NA	3	2	TC	480	sunny	NA
2015-08-07	Purple Tansy	3	12:22:00	27.2	50	3	1	LS	NA	sunny	NA
2015-08-07	Purple Tansy	4	10:23:00	25.6	51	0	5	PL	489	sunny	NA
2015-08-07	Purple Tansy	4	13:07:00	29	47	1	1	LS	NA	sunny	NA
2015-08-07	Purple Tansy	5	10:36:00	25.4	51	3	0	PL	478	sunny	NA
2015-08-07	Purple Tansy	5	12:34:00	29	45	1	1	AG	NA	sunny	NA
2015-08-07	Purple Tansy	6	10:10:00	27.8	49	3	3	PL	473	sunny	NA
2015-08-07	Purple Tansy	6	12:21:00	29.6	45	2	2	AG	NA	sunny	NA
2015-08-07	Purple Tansy	7	09:45:00	24.1	NA	0	1	TC	477	sunny	NA
2015-08-07	Purple Tansy	7	12:48:00	27.2	45	1	0	AG	NA	sunny	NA
2015-08-07	Purple Tansy	8	10:17:00	24.9	NA	0	0	TC	480	sunny	NA
2015-08-07	Purple Tansy	8	13:22:00	26.2	48	2	0	LS	NA	sunny	NA
2015-08-07	Purple Tansy	9	10:32:00	24.4	NA	2	0	TC	484	sunny	NA
2015-08-07	Purple Tansy	9	13:21:00	27.4	45	1	2	AG	NA	sunny	NA
2015-08-07	Purple Tansy	10	10:02:00	23.5	NA	0	0	TC	483	sunny	NA
2015-08-07	Purple Tansy	10	13:05:00	27.4	47	0	0	AG	NA	sunny	NA
2015-08-10	Purple Tansy	1	08:26:00	20.8	59	3	7	PL	471	cloudy	NA
2015-08-10	Purple Tansy	1	10:58:00	28.2	NA	7	6	TC	NA	cloudy	NA
2015-08-10	Purple Tansy	2	08:28:00	22.4	49	1	1	KH	470	cloudy	NA
2015-08-10	Purple Tansy	2	11:33:00	28.8	NA	2	3	TC	NA	cloudy	NA
2015-08-10	Purple Tansy	3	08:44:00	22.9	58	2	4	PL	465	cloudy	NA
2015-08-10	Purple Tansy	3	11:45:00	33	51	9	3	PL	NA	cloudy	NA
2015-08-10	Purple Tansy	4	08:42:00	22.4	49	1	5	KH	469	cloudy	NA
2015-08-10	Purple Tansy	4	11:16:00	28.4	NA	4	4	TC	NA	cloudy	NA
2015-08-10	Purple Tansy	5	09:03:00	23.1	59	3	5	PL	461	cloudy	NA
2015-08-10	Purple Tansy	5	11:49:00	29.9	NA	3	2	TC	NA	cloudy	NA
2015-08-10	Purple Tansy	6	09:28:00	25.2	59	1	2	PL	462	cloudy	NA
2015-08-10	Purple Tansy	6	10:56:00	28.1	56	3	3	AG	NA	cloudy	NA
2015-08-10	Purple Tansy	7	09:16:00	23.8	60	3	6	PL	466	cloudy	NA
2015-08-10	Purple Tansy	7	11:10:00	29	56	1	0	AG	NA	cloudy	NA
2015-08-10	Purple Tansy	8	08:56:00	22.4	48	2	1	KH	467	cloudy	NA
2015-08-10	Purple Tansy	8	11:43:00	29.4	65	4	2	LS	NA	cloudy	NA
2015-08-10	Purple Tansy	9	09:11:00	22.9	49	2	4	KH	469	cloudy	NA
2015-08-10	Purple Tansy	9	11:23:00	29.3	56	4	6	AG	NA	cloudy	NA
2015-08-10	Purple Tansy	10	09:24:00	24.9	45	2	1	KH	471	cloudy	NA
2015-08-10	Purple Tansy	10	11:38:00	29.1	57	1	1	AG	NA	cloudy	NA
2015-08-12	Purple Tansy	1	09:19:00	21.9	66	4	2	AG	NA	cloudy	NA
2015-08-12	Purple Tansy	1	10:35:00	NA	NA	5	3	KH	NA	cloudy	NA
2015-08-12	Purple Tansy	2	10:01:00	20.9	64	5	2	AG	NA	cloudy	NA
2015-08-12	Purple Tansy	2	10:48:00	NA	NA	6	2	KH	NA	cloudy	NA
2015-08-12	Purple Tansy	3	09:34:00	22	65	3	1	AG	NA	cloudy	NA
2015-08-12	Purple Tansy	3	11:02:00	NA	NA	3	0	KH	NA	cloudy	NA
2015-08-12	Purple Tansy	4	09:47:00	23.4	62	4	3	AG	NA	cloudy	NA
2015-08-12	Purple Tansy	4	11:16:00	NA	NA	1	3	KH	NA	cloudy	NA
2015-08-12	Purple Tansy	5	10:17:00	21.1	64	6	2	AG	NA	cloudy	NA
2015-08-12	Purple Tansy	5	11:29:00	NA	NA	8	3	KH	NA	cloudy	NA
2015-08-12	Purple Tansy	6	09:39:00	21.8	NA	1	5	TC	NA	cloudy	NA
2015-08-12	Purple Tansy	6	10:50:00	24.9	58	3	4	PL	NA	cloudy	NA
2015-08-12	Purple Tansy	7	09:23:00	21.8	NA	4	1	TC	NA	cloudy	NA
2015-08-12	Purple Tansy	7	10:37:00	25.2	57	4	5	PL	NA	cloudy	NA
2015-08-12	Purple Tansy	8	10:26:00	23.1	NA	2	3	TC	NA	cloudy	NA
2015-08-12	Purple Tansy	8	11:30:00	23.8	55	8	6	PL	NA	cloudy	NA
2015-08-12	Purple Tansy	9	09:55:00	22	NA	3	4	TC	NA	cloudy	NA
2015-08-12	Purple Tansy	9	11:03:00	24.7	56	8	5	PL	NA	cloudy	NA
2015-08-12	Purple Tansy	10	10:09:00	21.4	NA	2	2	TC	NA	cloudy	NA
2015-08-12	Purple Tansy	10	11:16:00	24.1	56	5	0	PL	NA	cloudy	NA
2015-08-14	Purple Tansy	1	09:00:00	24.7	69	7	4	PL	459	rainy	NA
2015-08-14	Purple Tansy	1	10:40:00	27.6	66	8	10	TC	NA	rainy	NA
2015-08-14	Purple Tansy	2	09:26:00	25.9	70	6	4	PL	461	rainy	NA
2015-08-14	Purple Tansy	2	11:09:00	29.2	66	7	8	TC	NA	rainy	NA
2015-08-14	Purple Tansy	3	09:53:00	27.4	67	8	9	PL	450	rainy	NA
2015-08-14	Purple Tansy	3	10:55:00	29.5	65	9	4	TC	NA	rainy	NA
2015-08-14	Purple Tansy	4	09:40:00	28.4	65	12	11	PL	464	rainy	NA
2015-08-14	Purple Tansy	4	13:35:00	25.6	66	7	8	TC	NA	rainy	NA
2015-08-14	Purple Tansy	5	09:50:00	25.5	74	9	12	TC	454	rainy	NA
2015-08-14	Purple Tansy	5	13:49:00	25.9	69	6	9	TC	NA	rainy	NA
2015-08-14	Purple Tansy	6	09:35:00	25.9	75	1	1	TC	458	rainy	NA
2015-08-14	Purple Tansy	6	13:44:00	26.5	64	3	11	PL	NA	rainy	NA
2015-08-14	Purple Tansy	7	09:32:00	NA	NA	2	4	AG	459	rainy	NA
2015-08-14	Purple Tansy	7	10:37:00	31.5	60	3	2	PL	NA	rainy	NA
2015-08-14	Purple Tansy	8	09:18:00	24.7	74	4	5	TC	459	rainy	NA
2015-08-14	Purple Tansy	8	13:31:00	25.8	61	9	8	PL	NA	rainy	NA
2015-08-14	Purple Tansy	9	09:45:00	NA	NA	7	8	AG	460	rainy	NA
2015-08-14	Purple Tansy	9	10:51:00	31.1	57	12	2	PL	NA	rainy	NA
2015-08-14	Purple Tansy	10	09:02:00	24.1	73	1	1	TC	463	rainy	NA
2015-08-14	Purple Tansy	10	11:06:00	30.8	59	7	8	PL	NA	rainy	NA
2015-08-17	Purple Tansy	1	09:09:00	28.1	71	7	8	PL	463	sunny	NA
2015-08-17	Purple Tansy	1	11:05:00	30.5	69	14	6	TC	NA	sunny	NA
2015-08-17	Purple Tansy	2	09:53:00	21.8	68	15	9	PL	464	sunny	NA
2015-08-17	Purple Tansy	2	11:35:00	32.5	68	14	10	TC	NA	sunny	NA
2015-08-17	Purple Tansy	3	09:23:00	32.2	65	11	11	PL	457	sunny	NA
2015-08-17	Purple Tansy	3	11:20:00	32.1	69	14	6	TC	NA	sunny	NA
2015-08-17	Purple Tansy	4	10:06:00	32.1	65	11	6	PL	469	sunny	NA
2015-08-17	Purple Tansy	4	11:17:00	35.1	38	12	10	AG	NA	sunny	NA
2015-08-17	Purple Tansy	5	09:39:00	31.4	68	13	9	PL	459	sunny	NA
2015-08-17	Purple Tansy	5	11:33:00	33.9	41	19	18	AG	NA	sunny	NA
2015-08-17	Purple Tansy	6	09:25:00	26.5	78	2	8	TC	460	sunny	NA
2015-08-17	Purple Tansy	6	11:04:00	34.9	41	5	8	AG	NA	sunny	NA
2015-08-17	Purple Tansy	7	09:11:00	26.8	75	3	7	TC	462	sunny	NA
2015-08-17	Purple Tansy	7	11:43:00	36.1	56	5	7	PL	NA	sunny	NA
2015-08-17	Purple Tansy	8	09:41:00	27.1	78	9	5	TC	460	sunny	NA
2015-08-17	Purple Tansy	8	11:02:00	33.4	60	16	4	PL	NA	sunny	NA
2015-08-17	Purple Tansy	9	10:13:00	28.6	76	8	5	TC	464	sunny	NA
2015-08-17	Purple Tansy	9	11:29:00	34.9	57	19	8	PL	NA	sunny	NA
2015-08-17	Purple Tansy	10	09:58:00	28.2	76	5	3	TC	468	sunny	NA
2015-08-17	Purple Tansy	10	11:16:00	33.7	60	8	6	PL	NA	sunny	NA
2015-08-19	Purple Tansy	1	09:08:00	28.1	73	8	7	PL	NA	cloudy	NA
2015-08-19	Purple Tansy	1	10:03:00	31.4	NA	7	4	AG	NA	cloudy	NA
2015-08-19	Purple Tansy	2	09:22:00	28.8	70	9	10	PL	NA	cloudy	NA
2015-08-19	Purple Tansy	2	10:33:00	30.5	NA	14	8	AG	NA	cloudy	NA
2015-08-19	Purple Tansy	3	09:37:00	29.4	67	6	9	PL	NA	cloudy	NA
2015-08-19	Purple Tansy	3	10:18:00	31.6	NA	5	2	AG	NA	cloudy	NA
2015-08-19	Purple Tansy	4	09:12:00	29.2	69	3	7	TC	NA	cloudy	NA
2015-08-19	Purple Tansy	4	10:03:00	30.4	63	13	13	PL	NA	cloudy	NA
2015-08-19	Purple Tansy	5	09:50:00	31	67	5	5	PL	NA	cloudy	NA
2015-08-19	Purple Tansy	5	10:43:00	29.8	65	10	4	PL	NA	cloudy	NA
2015-08-19	Purple Tansy	6	09:27:00	28.8	67	5	11	TC	NA	cloudy	NA
2015-08-19	Purple Tansy	6	10:16:00	29.9	64	7	11	PL	NA	cloudy	NA
2015-08-19	Purple Tansy	7	09:42:00	27.4	71	7	5	TC	NA	cloudy	NA
2015-08-19	Purple Tansy	7	10:29:00	28.9	63	9	2	PL	NA	cloudy	NA
2015-08-19	Purple Tansy	8	09:41:00	31.4	NA	8	3	AG	NA	cloudy	NA
2015-08-19	Purple Tansy	8	10:36:00	27.7	66	11	15	TC	NA	cloudy	NA
2015-08-19	Purple Tansy	9	09:14:00	28.8	NA	4	3	AG	NA	cloudy	NA
2015-08-19	Purple Tansy	9	10:20:00	30.9	64	6	1	TC	NA	cloudy	NA
2015-08-19	Purple Tansy	10	09:27:00	30.1	NA	2	3	AG	NA	cloudy	NA
2015-08-19	Purple Tansy	10	10:07:00	29.9	64	4	1	TC	NA	cloudy	NA
2015-08-21	Purple Tansy	1	09:39:00	20.5	60	8	0	TC	454	sunny	NA
2015-08-21	Purple Tansy	1	11:49:00	25.7	56	8	5	PL	NA	sunny	NA
2015-08-21	Purple Tansy	2	09:53:00	21	60	4	5	TC	464	sunny	NA
2015-08-21	Purple Tansy	2	12:04:00	27.6	51	14	8	PL	NA	sunny	NA
2015-08-21	Purple Tansy	3	10:24:00	22.2	56	7	1	TC	455	sunny	NA
2015-08-21	Purple Tansy	3	12:20:00	26.9	50	12	5	PL	NA	sunny	NA
2015-08-21	Purple Tansy	4	10:10:00	24.2	56	5	3	TC	467	sunny	NA
2015-08-21	Purple Tansy	4	12:22:00	26	49	5	7	AG	NA	sunny	NA
2015-08-21	Purple Tansy	5	09:23:00	21.8	61	1	1	TC	456	sunny	NA
2015-08-21	Purple Tansy	5	12:07:00	26.3	51	7	4	AG	NA	sunny	NA
2015-08-21	Purple Tansy	6	09:52:00	24.1	55	1	0	AG	459	sunny	NA
2015-08-21	Purple Tansy	6	11:53:00	24.4	49	5	1	AG	NA	sunny	NA
2015-08-21	Purple Tansy	7	09:37:00	23.9	57	2	1	AG	455	sunny	NA
2015-08-21	Purple Tansy	7	12:35:00	30.1	49	6	5	PL	NA	sunny	NA
2015-08-21	Purple Tansy	8	10:16:00	23.8	54	2	0	AG	455	sunny	NA
2015-08-21	Purple Tansy	8	11:56:00	25	49	6	0	TC	NA	sunny	NA
2015-08-21	Purple Tansy	9	09:19:00	22.2	60	0	0	AG	457	sunny	NA
2015-08-21	Purple Tansy	9	12:27:00	24.3	49	8	8	TC	NA	sunny	NA
2015-08-21	Purple Tansy	10	10:31:00	24.4	49	5	1	AG	462	sunny	NA
2015-08-21	Purple Tansy	10	12:12:00	25.3	49	7	0	TC	NA	sunny	NA
2015-08-10	Buckwheat	1	NA	NA	NA	NA	NA	NA	543.4	NA	NA
2015-08-10	Buckwheat	2	NA	NA	NA	NA	NA	NA	551.9	NA	NA
2015-08-10	Buckwheat	3	NA	NA	NA	NA	NA	NA	538	NA	NA
2015-08-10	Buckwheat	4	NA	NA	NA	NA	NA	NA	552.9	NA	NA
2015-08-10	Buckwheat	5	NA	NA	NA	NA	NA	NA	571.2	NA	NA
2015-08-10	Buckwheat	6	NA	NA	NA	NA	NA	NA	543.7	NA	NA
2015-08-10	Buckwheat	7	NA	NA	NA	NA	NA	NA	550.8	NA	NA
2015-08-10	Buckwheat	8	NA	NA	NA	NA	NA	NA	550	NA	NA
2015-08-10	Buckwheat	9	NA	NA	NA	NA	NA	NA	579.8	NA	NA
2015-08-10	Buckwheat	10	NA	NA	NA	NA	NA	NA	562.1	NA	NA
2015-08-14	Buckwheat	1	NA	NA	NA	NA	NA	NA	559.5	NA	NA
2015-08-14	Buckwheat	2	NA	NA	NA	NA	NA	NA	567.9	NA	NA
2015-08-14	Buckwheat	3	NA	NA	NA	NA	NA	NA	566.4	NA	NA
2015-08-14	Buckwheat	4	NA	NA	NA	NA	NA	NA	576.9	NA	NA
2015-08-14	Buckwheat	5	NA	NA	NA	NA	NA	NA	598.2	NA	NA
2015-08-14	Buckwheat	6	NA	NA	NA	NA	NA	NA	567.3	NA	NA
2015-08-14	Buckwheat	7	NA	NA	NA	NA	NA	NA	579.8	NA	NA
2015-08-14	Buckwheat	8	NA	NA	NA	NA	NA	NA	574	NA	NA
2015-08-14	Buckwheat	9	NA	NA	NA	NA	NA	NA	599.7	NA	NA
2015-08-14	Buckwheat	10	NA	NA	NA	NA	NA	NA	587.1	NA	NA
2015-08-17	Buckwheat	1	NA	NA	NA	NA	NA	NA	568.7	NA	NA
2015-08-17	Buckwheat	2	NA	NA	NA	NA	NA	NA	580.9	NA	NA
2015-08-17	Buckwheat	3	NA	NA	NA	NA	NA	NA	588.7	NA	NA
2015-08-17	Buckwheat	4	NA	NA	NA	NA	NA	NA	589.1	NA	NA
2015-08-17	Buckwheat	5	NA	NA	NA	NA	NA	NA	613.8	NA	NA
2015-08-17	Buckwheat	6	NA	NA	NA	NA	NA	NA	581.1	NA	NA
2015-08-17	Buckwheat	7	NA	NA	NA	NA	NA	NA	597.1	NA	NA
2015-08-17	Buckwheat	8	NA	NA	NA	NA	NA	NA	587.7	NA	NA
2015-08-17	Buckwheat	9	NA	NA	NA	NA	NA	NA	611.3	NA	NA
2015-08-17	Buckwheat	10	NA	NA	NA	NA	NA	NA	607.4	NA	NA
2015-08-21	Buckwheat	1	NA	NA	NA	NA	NA	NA	578	NA	NA
2015-08-21	Buckwheat	2	NA	NA	NA	NA	NA	NA	593	NA	NA
2015-08-21	Buckwheat	3	NA	NA	NA	NA	NA	NA	620	NA	NA
2015-08-21	Buckwheat	4	NA	NA	NA	NA	NA	NA	605	NA	NA
2015-08-21	Buckwheat	5	NA	NA	NA	NA	NA	NA	631	NA	NA
2015-08-21	Buckwheat	6	NA	NA	NA	NA	NA	NA	599	NA	NA
2015-08-21	Buckwheat	7	NA	NA	NA	NA	NA	NA	600	NA	NA
2015-08-21	Buckwheat	8	NA	NA	NA	NA	NA	NA	604	NA	NA
2015-08-21	Buckwheat	9	NA	NA	NA	NA	NA	NA	625	NA	NA
2015-08-21	Buckwheat	10	NA	NA	NA	NA	NA	NA	626	NA	NA
2015-08-24	Buckwheat	1	NA	NA	NA	NA	NA	NA	581	NA	NA
2015-08-24	Buckwheat	2	NA	NA	NA	NA	NA	NA	600	NA	NA
2015-08-24	Buckwheat	3	NA	NA	NA	NA	NA	NA	640	NA	NA
2015-08-24	Buckwheat	4	NA	NA	NA	NA	NA	NA	614	NA	NA
2015-08-24	Buckwheat	5	NA	NA	NA	NA	NA	NA	638	NA	NA
2015-08-24	Buckwheat	6	NA	NA	NA	NA	NA	NA	606	NA	NA
2015-08-24	Buckwheat	7	NA	NA	NA	NA	NA	NA	604	NA	NA
2015-08-24	Buckwheat	8	NA	NA	NA	NA	NA	NA	610	NA	NA
2015-08-24	Buckwheat	9	NA	NA	NA	NA	NA	NA	636	NA	NA
2015-08-24	Buckwheat	10	NA	NA	NA	NA	NA	NA	632	NA	NA
2015-08-28	Buckwheat	1	NA	NA	NA	NA	NA	NA	595	NA	NA
2015-08-28	Buckwheat	2	NA	NA	NA	NA	NA	NA	615	NA	NA
2015-08-28	Buckwheat	3	NA	NA	NA	NA	NA	NA	663	NA	NA
2015-08-28	Buckwheat	4	NA	NA	NA	NA	NA	NA	633	NA	NA
2015-08-28	Buckwheat	5	NA	NA	NA	NA	NA	NA	646	NA	NA
2015-08-28	Buckwheat	6	NA	NA	NA	NA	NA	NA	625	NA	NA
2015-08-28	Buckwheat	7	NA	NA	NA	NA	NA	NA	615	NA	NA
2015-08-28	Buckwheat	8	NA	NA	NA	NA	NA	NA	629	NA	NA
2015-08-28	Buckwheat	9	NA	NA	NA	NA	NA	NA	655	NA	NA
2015-08-28	Buckwheat	10	NA	NA	NA	NA	NA	NA	647	NA	NA
2015-08-31	Buckwheat	1	NA	NA	NA	NA	NA	NA	607	NA	NA
2015-08-31	Buckwheat	2	NA	NA	NA	NA	NA	NA	623	NA	NA
2015-08-31	Buckwheat	3	NA	NA	NA	NA	NA	NA	681	NA	NA
2015-08-31	Buckwheat	4	NA	NA	NA	NA	NA	NA	638	NA	NA
2015-08-31	Buckwheat	5	NA	NA	NA	NA	NA	NA	652	NA	NA
2015-08-31	Buckwheat	6	NA	NA	NA	NA	NA	NA	636	NA	NA
2015-08-31	Buckwheat	7	NA	NA	NA	NA	NA	NA	621	NA	NA
2015-08-31	Buckwheat	8	NA	NA	NA	NA	NA	NA	635	NA	NA
2015-08-31	Buckwheat	9	NA	NA	NA	NA	NA	NA	664	NA	NA
2015-08-31	Buckwheat	10	NA	NA	NA	NA	NA	NA	656	NA	NA
2015-09-04	Buckwheat	1	NA	NA	NA	NA	NA	NA	621	NA	NA
2015-09-04	Buckwheat	2	NA	NA	NA	NA	NA	NA	629	NA	NA
2015-09-04	Buckwheat	3	NA	NA	NA	NA	NA	NA	696	NA	NA
2015-09-04	Buckwheat	4	NA	NA	NA	NA	NA	NA	651	NA	NA
2015-09-04	Buckwheat	5	NA	NA	NA	NA	NA	NA	652	NA	NA
2015-09-04	Buckwheat	6	NA	NA	NA	NA	NA	NA	650	NA	NA
2015-09-04	Buckwheat	7	NA	NA	NA	NA	NA	NA	625	NA	NA
2015-09-04	Buckwheat	8	NA	NA	NA	NA	NA	NA	653	NA	NA
2015-09-04	Buckwheat	9	NA	NA	NA	NA	NA	NA	666	NA	NA
2015-09-04	Buckwheat	10	NA	NA	NA	NA	NA	NA	666	NA	NA
2015-09-07	Buckwheat	1	NA	NA	NA	NA	NA	NA	628	NA	NA
2015-09-07	Buckwheat	2	NA	NA	NA	NA	NA	NA	633	NA	NA
2015-09-07	Buckwheat	3	NA	NA	NA	NA	NA	NA	696	NA	NA
2015-09-07	Buckwheat	4	NA	NA	NA	NA	NA	NA	659	NA	NA
2015-09-07	Buckwheat	5	NA	NA	NA	NA	NA	NA	662	NA	NA
2015-09-07	Buckwheat	6	NA	NA	NA	NA	NA	NA	664	NA	NA
2015-09-07	Buckwheat	7	NA	NA	NA	NA	NA	NA	632	NA	NA
2015-09-07	Buckwheat	8	NA	NA	NA	NA	NA	NA	658	NA	NA
2015-09-07	Buckwheat	9	NA	NA	NA	NA	NA	NA	667	NA	NA
2015-09-07	Buckwheat	10	NA	NA	NA	NA	NA	NA	668	NA	NA
2015-09-11	Buckwheat	1	NA	NA	NA	NA	NA	NA	633	NA	NA
2015-09-11	Buckwheat	2	NA	NA	NA	NA	NA	NA	634	NA	NA
2015-09-11	Buckwheat	3	NA	NA	NA	NA	NA	NA	708	NA	NA
2015-09-11	Buckwheat	4	NA	NA	NA	NA	NA	NA	666	NA	NA
2015-09-11	Buckwheat	5	NA	NA	NA	NA	NA	NA	670	NA	NA
2015-09-11	Buckwheat	6	NA	NA	NA	NA	NA	NA	675	NA	NA
2015-09-11	Buckwheat	7	NA	NA	NA	NA	NA	NA	637	NA	NA
2015-09-11	Buckwheat	8	NA	NA	NA	NA	NA	NA	666	NA	NA
2015-09-11	Buckwheat	9	NA	NA	NA	NA	NA	NA	667	NA	NA
2015-09-11	Buckwheat	10	NA	NA	NA	NA	NA	NA	670	NA	NA
2015-09-14	Buckwheat	1	NA	NA	NA	NA	NA	NA	636	NA	NA
2015-09-14	Buckwheat	2	NA	NA	NA	NA	NA	NA	653	NA	NA
2015-09-14	Buckwheat	3	NA	NA	NA	NA	NA	NA	727	NA	NA
2015-09-14	Buckwheat	4	NA	NA	NA	NA	NA	NA	681	NA	NA
2015-09-14	Buckwheat	5	NA	NA	NA	NA	NA	NA	693	NA	NA
2015-09-14	Buckwheat	6	NA	NA	NA	NA	NA	NA	449	NA	NA
2015-09-14	Buckwheat	7	NA	NA	NA	NA	NA	NA	644	NA	NA
2015-09-14	Buckwheat	8	NA	NA	NA	NA	NA	NA	694	NA	NA
2015-09-14	Buckwheat	9	NA	NA	NA	NA	NA	NA	678	NA	NA
2015-09-14	Buckwheat	10	NA	NA	NA	NA	NA	NA	672	NA	NA
2015-09-18	Buckwheat	1	NA	NA	NA	NA	NA	NA	657	NA	NA
2015-09-18	Buckwheat	2	NA	NA	NA	NA	NA	NA	672	NA	NA
2015-09-18	Buckwheat	3	NA	NA	NA	NA	NA	NA	757	NA	NA
2015-09-18	Buckwheat	4	NA	NA	NA	NA	NA	NA	703	NA	NA
2015-09-18	Buckwheat	5	NA	NA	NA	NA	NA	NA	721	NA	NA
2015-09-18	Buckwheat	6	NA	NA	NA	NA	NA	NA	716	NA	NA
2015-09-18	Buckwheat	7	NA	NA	NA	NA	NA	NA	656	NA	NA
2015-09-18	Buckwheat	8	NA	NA	NA	NA	NA	NA	715	NA	NA
2015-09-18	Buckwheat	9	NA	NA	NA	NA	NA	NA	695	NA	NA
2015-09-18	Buckwheat	10	NA	NA	NA	NA	NA	NA	681	NA	NA
2015-09-22	Buckwheat	1	NA	NA	NA	NA	NA	NA	663	NA	NA
2015-09-22	Buckwheat	2	NA	NA	NA	NA	NA	NA	696	NA	NA
2015-09-22	Buckwheat	3	NA	NA	NA	NA	NA	NA	784	NA	NA
2015-09-22	Buckwheat	4	NA	NA	NA	NA	NA	NA	723	NA	NA
2015-09-22	Buckwheat	5	NA	NA	NA	NA	NA	NA	748	NA	NA
2015-09-22	Buckwheat	6	NA	NA	NA	NA	NA	NA	734	NA	NA
2015-09-22	Buckwheat	7	NA	NA	NA	NA	NA	NA	667	NA	NA
2015-09-22	Buckwheat	8	NA	NA	NA	NA	NA	NA	725	NA	NA
2015-09-22	Buckwheat	9	NA	NA	NA	NA	NA	NA	721	NA	NA
2015-09-24	Buckwheat	1	NA	NA	NA	NA	NA	NA	669	NA	NA
2015-09-24	Buckwheat	2	NA	NA	NA	NA	NA	NA	699	NA	NA
2015-09-24	Buckwheat	3	NA	NA	NA	NA	NA	NA	791	NA	NA
2015-09-24	Buckwheat	4	NA	NA	NA	NA	NA	NA	727	NA	NA
2015-09-24	Buckwheat	5	NA	NA	NA	NA	NA	NA	747	NA	NA
2015-09-24	Buckwheat	6	NA	NA	NA	NA	NA	NA	737	NA	NA
2015-09-24	Buckwheat	7	NA	NA	NA	NA	NA	NA	671	NA	NA
2015-09-24	Buckwheat	9	NA	NA	NA	NA	NA	NA	728	NA	NA
2015-09-28	Buckwheat	1	NA	NA	NA	NA	NA	NA	685	NA	NA
2015-09-28	Buckwheat	3	NA	NA	NA	NA	NA	NA	811	NA	NA
2015-09-28	Buckwheat	4	NA	NA	NA	NA	NA	NA	745	NA	NA
2015-09-28	Buckwheat	5	NA	NA	NA	NA	NA	NA	759	NA	NA
2015-09-28	Buckwheat	6	NA	NA	NA	NA	NA	NA	760	NA	NA
2015-09-28	Buckwheat	7	NA	NA	NA	NA	NA	NA	689	NA	NA
2015-09-28	Buckwheat	9	NA	NA	NA	NA	NA	NA	745	NA	NA
2015-10-02	Buckwheat	3	NA	NA	NA	NA	NA	NA	827	NA	NA
2015-10-02	Buckwheat	4	NA	NA	NA	NA	NA	NA	746	NA	NA
2015-10-02	Buckwheat	5	NA	NA	NA	NA	NA	NA	765	NA	NA
2015-10-02	Buckwheat	6	NA	NA	NA	NA	NA	NA	767	NA	NA
2015-10-02	Buckwheat	7	NA	NA	NA	NA	NA	NA	699	NA	NA
2015-10-02	Buckwheat	9	NA	NA	NA	NA	NA	NA	757	NA	NA
2015-10-05	Buckwheat	3	NA	NA	NA	NA	NA	NA	848	NA	NA
2015-10-05	Buckwheat	4	NA	NA	NA	NA	NA	NA	755	NA	NA
2015-10-05	Buckwheat	5	NA	NA	NA	NA	NA	NA	774	NA	NA
2015-10-05	Buckwheat	6	NA	NA	NA	NA	NA	NA	780	NA	NA
2015-10-05	Buckwheat	7	NA	NA	NA	NA	NA	NA	712	NA	NA
2015-10-05	Buckwheat	9	NA	NA	NA	NA	NA	NA	768	NA	NA
2015-10-09	Buckwheat	3	NA	NA	NA	NA	NA	NA	860	NA	NA
2015-10-09	Buckwheat	5	NA	NA	NA	NA	NA	NA	776	NA	NA
2015-10-12	Buckwheat	3	NA	NA	NA	NA	NA	NA	880	NA	NA
2015-10-12	Buckwheat	5	NA	NA	NA	NA	NA	NA	782	NA	NA
2015-10-16	Buckwheat	3	NA	NA	NA	NA	NA	NA	902	NA	NA
2015-08-14	Red clover	1	NA	NA	NA	NA	NA	NA	487	NA	NA
2015-08-14	Red clover	2	NA	NA	NA	NA	NA	NA	469.4	NA	NA
2015-08-14	Red clover	3	NA	NA	NA	NA	NA	NA	466.9	NA	NA
2015-08-14	Red clover	4	NA	NA	NA	NA	NA	NA	461.6	NA	NA
2015-08-14	Red clover	5	NA	NA	NA	NA	NA	NA	483.6	NA	NA
2015-08-14	Red clover	6	NA	NA	NA	NA	NA	NA	482.4	NA	NA
2015-08-14	Red clover	7	NA	NA	NA	NA	NA	NA	488.7	NA	NA
2015-08-14	Red clover	8	NA	NA	NA	NA	NA	NA	480.9	NA	NA
2015-08-14	Red clover	9	NA	NA	NA	NA	NA	NA	474.4	NA	NA
2015-08-14	Red clover	10	NA	NA	NA	NA	NA	NA	462.1	NA	NA
2015-08-17	Red clover	1	NA	NA	NA	NA	NA	NA	500.7	NA	NA
2015-08-17	Red clover	2	NA	NA	NA	NA	NA	NA	481.1	NA	NA
2015-08-17	Red clover	3	NA	NA	NA	NA	NA	NA	479.8	NA	NA
2015-08-17	Red clover	4	NA	NA	NA	NA	NA	NA	470	NA	NA
2015-08-17	Red clover	5	NA	NA	NA	NA	NA	NA	492.1	NA	NA
2015-08-17	Red clover	6	NA	NA	NA	NA	NA	NA	494.5	NA	NA
2015-08-17	Red clover	7	NA	NA	NA	NA	NA	NA	497.8	NA	NA
2015-08-17	Red clover	8	NA	NA	NA	NA	NA	NA	491.5	NA	NA
2015-08-17	Red clover	9	NA	NA	NA	NA	NA	NA	487.3	NA	NA
2015-08-17	Red clover	10	NA	NA	NA	NA	NA	NA	470.9	NA	NA
2015-08-21	Red clover	1	NA	NA	NA	NA	NA	NA	511	NA	NA
2015-08-21	Red clover	2	NA	NA	NA	NA	NA	NA	493	NA	NA
2015-08-21	Red clover	3	NA	NA	NA	NA	NA	NA	489	NA	NA
2015-08-21	Red clover	4	NA	NA	NA	NA	NA	NA	482	NA	NA
2015-08-21	Red clover	5	NA	NA	NA	NA	NA	NA	502	NA	NA
2015-08-21	Red clover	6	NA	NA	NA	NA	NA	NA	498	NA	NA
2015-08-21	Red clover	7	NA	NA	NA	NA	NA	NA	505	NA	NA
2015-08-21	Red clover	8	NA	NA	NA	NA	NA	NA	504	NA	NA
2015-08-21	Red clover	9	NA	NA	NA	NA	NA	NA	495	NA	NA
2015-08-21	Red clover	10	NA	NA	NA	NA	NA	NA	480	NA	NA
2015-08-24	Red clover	1	NA	NA	NA	NA	NA	NA	519	NA	NA
2015-08-24	Red clover	2	NA	NA	NA	NA	NA	NA	503	NA	NA
2015-08-24	Red clover	3	NA	NA	NA	NA	NA	NA	499	NA	NA
2015-08-24	Red clover	4	NA	NA	NA	NA	NA	NA	493	NA	NA
2015-08-24	Red clover	5	NA	NA	NA	NA	NA	NA	511	NA	NA
2015-08-24	Red clover	6	NA	NA	NA	NA	NA	NA	454	NA	NA
2015-08-24	Red clover	7	NA	NA	NA	NA	NA	NA	513	NA	NA
2015-08-24	Red clover	8	NA	NA	NA	NA	NA	NA	511	NA	NA
2015-08-24	Red clover	9	NA	NA	NA	NA	NA	NA	499	NA	NA
2015-08-24	Red clover	10	NA	NA	NA	NA	NA	NA	489	NA	NA
2015-08-28	Red clover	1	NA	NA	NA	NA	NA	NA	534	NA	NA
2015-08-28	Red clover	2	NA	NA	NA	NA	NA	NA	520	NA	NA
2015-08-28	Red clover	3	NA	NA	NA	NA	NA	NA	515	NA	NA
2015-08-28	Red clover	4	NA	NA	NA	NA	NA	NA	500	NA	NA
2015-08-28	Red clover	5	NA	NA	NA	NA	NA	NA	518	NA	NA
2015-08-28	Red clover	6	NA	NA	NA	NA	NA	NA	521	NA	NA
2015-08-28	Red clover	7	NA	NA	NA	NA	NA	NA	518	NA	NA
2015-08-28	Red clover	8	NA	NA	NA	NA	NA	NA	523	NA	NA
2015-08-28	Red clover	9	NA	NA	NA	NA	NA	NA	508	NA	NA
2015-08-28	Red clover	10	NA	NA	NA	NA	NA	NA	501	NA	NA
2015-08-31	Red clover	1	NA	NA	NA	NA	NA	NA	545	NA	NA
2015-08-31	Red clover	2	NA	NA	NA	NA	NA	NA	524	NA	foundress queen dead
2015-08-31	Red clover	3	NA	NA	NA	NA	NA	NA	520	NA	NA
2015-08-31	Red clover	4	NA	NA	NA	NA	NA	NA	507	NA	NA
2015-08-31	Red clover	5	NA	NA	NA	NA	NA	NA	524	NA	NA
2015-08-31	Red clover	6	NA	NA	NA	NA	NA	NA	527	NA	NA
2015-08-31	Red clover	7	NA	NA	NA	NA	NA	NA	521	NA	NA
2015-08-31	Red clover	8	NA	NA	NA	NA	NA	NA	530	NA	NA
2015-08-31	Red clover	9	NA	NA	NA	NA	NA	NA	514	NA	NA
2015-08-31	Red clover	10	NA	NA	NA	NA	NA	NA	506	NA	NA
2015-09-04	Red clover	1	NA	NA	NA	NA	NA	NA	550	NA	NA
2015-09-04	Red clover	2	NA	NA	NA	NA	NA	NA	533	NA	NA
2015-09-04	Red clover	3	NA	NA	NA	NA	NA	NA	520	NA	NA
2015-09-04	Red clover	4	NA	NA	NA	NA	NA	NA	513	NA	NA
2015-09-04	Red clover	5	NA	NA	NA	NA	NA	NA	526	NA	NA
2015-09-04	Red clover	6	NA	NA	NA	NA	NA	NA	537	NA	NA
2015-09-04	Red clover	7	NA	NA	NA	NA	NA	NA	527	NA	NA
2015-09-04	Red clover	8	NA	NA	NA	NA	NA	NA	539	NA	NA
2015-09-04	Red clover	9	NA	NA	NA	NA	NA	NA	519	NA	NA
2015-09-04	Red clover	10	NA	NA	NA	NA	NA	NA	517	NA	NA
2015-09-07	Red clover	1	NA	NA	NA	NA	NA	NA	559	NA	NA
2015-09-07	Red clover	2	NA	NA	NA	NA	NA	NA	538	NA	NA
2015-09-07	Red clover	3	NA	NA	NA	NA	NA	NA	525	NA	NA
2015-09-07	Red clover	4	NA	NA	NA	NA	NA	NA	515	NA	NA
2015-09-07	Red clover	5	NA	NA	NA	NA	NA	NA	530	NA	NA
2015-09-07	Red clover	6	NA	NA	NA	NA	NA	NA	543	NA	NA
2015-09-07	Red clover	7	NA	NA	NA	NA	NA	NA	528	NA	NA
2015-09-07	Red clover	8	NA	NA	NA	NA	NA	NA	543	NA	NA
2015-09-07	Red clover	9	NA	NA	NA	NA	NA	NA	520	NA	foundress queen dead
2015-09-07	Red clover	10	NA	NA	NA	NA	NA	NA	524	NA	NA
2015-09-11	Red clover	1	NA	NA	NA	NA	NA	NA	571	NA	NA
2015-09-11	Red clover	2	NA	NA	NA	NA	NA	NA	541	NA	NA
2015-09-11	Red clover	3	NA	NA	NA	NA	NA	NA	537	NA	NA
2015-09-11	Red clover	4	NA	NA	NA	NA	NA	NA	521	NA	NA
2015-09-11	Red clover	5	NA	NA	NA	NA	NA	NA	532	NA	NA
2015-09-11	Red clover	6	NA	NA	NA	NA	NA	NA	551	NA	NA
2015-09-11	Red clover	7	NA	NA	NA	NA	NA	NA	533	NA	NA
2015-09-11	Red clover	8	NA	NA	NA	NA	NA	NA	550	NA	NA
2015-09-11	Red clover	9	NA	NA	NA	NA	NA	NA	523	NA	NA
2015-09-11	Red clover	10	NA	NA	NA	NA	NA	NA	531	NA	NA
2015-09-14	Red clover	1	NA	NA	NA	NA	NA	NA	584	NA	NA
2015-09-14	Red clover	2	NA	NA	NA	NA	NA	NA	548	NA	NA
2015-09-14	Red clover	3	NA	NA	NA	NA	NA	NA	554	NA	NA
2015-09-14	Red clover	4	NA	NA	NA	NA	NA	NA	522	NA	NA
2015-09-14	Red clover	5	NA	NA	NA	NA	NA	NA	543	NA	NA
2015-09-14	Red clover	6	NA	NA	NA	NA	NA	NA	556	NA	NA
2015-09-14	Red clover	7	NA	NA	NA	NA	NA	NA	535	NA	NA
2015-09-14	Red clover	8	NA	NA	NA	NA	NA	NA	559	NA	NA
2015-09-14	Red clover	9	NA	NA	NA	NA	NA	NA	527	NA	NA
2015-09-14	Red clover	10	NA	NA	NA	NA	NA	NA	538	NA	NA
2015-09-18	Red clover	1	NA	NA	NA	NA	NA	NA	600	NA	NA
2015-09-18	Red clover	2	NA	NA	NA	NA	NA	NA	562	NA	NA
2015-09-18	Red clover	3	NA	NA	NA	NA	NA	NA	577	NA	NA
2015-09-18	Red clover	4	NA	NA	NA	NA	NA	NA	533	NA	NA
2015-09-18	Red clover	5	NA	NA	NA	NA	NA	NA	562	NA	NA
2015-09-18	Red clover	6	NA	NA	NA	NA	NA	NA	573	NA	NA
2015-09-18	Red clover	7	NA	NA	NA	NA	NA	NA	545	NA	NA
2015-09-18	Red clover	8	NA	NA	NA	NA	NA	NA	574	NA	NA
2015-09-18	Red clover	9	NA	NA	NA	NA	NA	NA	532	NA	NA
2015-09-18	Red clover	10	NA	NA	NA	NA	NA	NA	550	NA	NA
2015-09-22	Red clover	1	NA	NA	NA	NA	NA	NA	611	NA	NA
2015-09-22	Red clover	2	NA	NA	NA	NA	NA	NA	570	NA	NA
2015-09-22	Red clover	3	NA	NA	NA	NA	NA	NA	585	NA	NA
2015-09-22	Red clover	4	NA	NA	NA	NA	NA	NA	540	NA	NA
2015-09-22	Red clover	5	NA	NA	NA	NA	NA	NA	576	NA	NA
2015-09-22	Red clover	6	NA	NA	NA	NA	NA	NA	580	NA	NA
2015-09-22	Red clover	7	NA	NA	NA	NA	NA	NA	544	NA	NA
2015-09-22	Red clover	8	NA	NA	NA	NA	NA	NA	580	NA	NA
2015-09-22	Red clover	9	NA	NA	NA	NA	NA	NA	539	NA	NA
2015-09-22	Red clover	10	NA	NA	NA	NA	NA	NA	560	NA	NA
2015-09-24	Red clover	1	NA	NA	NA	NA	NA	NA	618	NA	NA
2015-09-24	Red clover	2	NA	NA	NA	NA	NA	NA	578	NA	NA
2015-09-24	Red clover	3	NA	NA	NA	NA	NA	NA	594	NA	NA
2015-09-24	Red clover	4	NA	NA	NA	NA	NA	NA	545	NA	NA
2015-09-24	Red clover	5	NA	NA	NA	NA	NA	NA	582	NA	NA
2015-09-24	Red clover	6	NA	NA	NA	NA	NA	NA	585	NA	NA
2015-09-24	Red clover	7	NA	NA	NA	NA	NA	NA	545	NA	NA
2015-09-24	Red clover	8	NA	NA	NA	NA	NA	NA	589	NA	NA
2015-09-24	Red clover	9	NA	NA	NA	NA	NA	NA	543	NA	NA
2015-09-24	Red clover	10	NA	NA	NA	NA	NA	NA	564	NA	NA
2015-09-28	Red clover	1	NA	NA	NA	NA	NA	NA	636	NA	NA
2015-09-28	Red clover	2	NA	NA	NA	NA	NA	NA	585	NA	NA
2015-09-28	Red clover	3	NA	NA	NA	NA	NA	NA	612	NA	NA
2015-09-28	Red clover	4	NA	NA	NA	NA	NA	NA	555	NA	NA
2015-09-28	Red clover	5	NA	NA	NA	NA	NA	NA	600	NA	NA
2015-09-28	Red clover	6	NA	NA	NA	NA	NA	NA	592	NA	NA
2015-09-28	Red clover	7	NA	NA	NA	NA	NA	NA	553	NA	NA
2015-09-28	Red clover	8	NA	NA	NA	NA	NA	NA	603	NA	NA
2015-09-28	Red clover	9	NA	NA	NA	NA	NA	NA	552	NA	NA
2015-09-28	Red clover	10	NA	NA	NA	NA	NA	NA	577	NA	NA
2015-10-02	Red clover	1	NA	NA	NA	NA	NA	NA	650	NA	NA
2015-10-02	Red clover	3	NA	NA	NA	NA	NA	NA	617	NA	NA
2015-10-02	Red clover	4	NA	NA	NA	NA	NA	NA	557	NA	NA
2015-10-02	Red clover	5	NA	NA	NA	NA	NA	NA	609	NA	NA
2015-10-02	Red clover	6	NA	NA	NA	NA	NA	NA	591	NA	NA
2015-10-02	Red clover	7	NA	NA	NA	NA	NA	NA	556	NA	NA
2015-10-02	Red clover	8	NA	NA	NA	NA	NA	NA	603	NA	NA
2015-10-02	Red clover	9	NA	NA	NA	NA	NA	NA	552	NA	NA
2015-10-02	Red clover	10	NA	NA	NA	NA	NA	NA	584	NA	NA
2015-10-05	Red clover	1	NA	NA	NA	NA	NA	NA	660	NA	NA
2015-10-05	Red clover	3	NA	NA	NA	NA	NA	NA	628	NA	NA
2015-10-05	Red clover	4	NA	NA	NA	NA	NA	NA	562	NA	NA
2015-10-05	Red clover	5	NA	NA	NA	NA	NA	NA	622	NA	NA
2015-10-05	Red clover	6	NA	NA	NA	NA	NA	NA	598	NA	NA
2015-10-05	Red clover	7	NA	NA	NA	NA	NA	NA	559	NA	NA
2015-10-05	Red clover	9	NA	NA	NA	NA	NA	NA	555	NA	NA
2015-10-09	Red clover	1	NA	NA	NA	NA	NA	NA	668	NA	NA
2015-10-09	Red clover	6	NA	NA	NA	NA	NA	NA	600	NA	NA
2015-10-12	Red clover	1	NA	NA	NA	NA	NA	NA	671	NA	NA
2015-10-12	Red clover	6	NA	NA	NA	NA	NA	NA	598	NA	NA
2015-08-24	Purple Tansy	1	NA	NA	NA	NA	NA	NA	496	NA	NA
2015-08-24	Purple Tansy	2	NA	NA	NA	NA	NA	NA	498	NA	NA
2015-08-24	Purple Tansy	3	NA	NA	NA	NA	NA	NA	484	NA	NA
2015-08-24	Purple Tansy	4	NA	NA	NA	NA	NA	NA	510	NA	NA
2015-08-24	Purple Tansy	5	NA	NA	NA	NA	NA	NA	487	NA	NA
2015-08-24	Purple Tansy	6	NA	NA	NA	NA	NA	NA	493	NA	NA
2015-08-24	Purple Tansy	7	NA	NA	NA	NA	NA	NA	495	NA	NA
2015-08-24	Purple Tansy	8	NA	NA	NA	NA	NA	NA	487	NA	NA
2015-08-24	Purple Tansy	9	NA	NA	NA	NA	NA	NA	487	NA	NA
2015-08-24	Purple Tansy	10	NA	NA	NA	NA	NA	NA	502	NA	NA
2015-08-28	Purple Tansy	1	NA	NA	NA	NA	NA	NA	523	NA	NA
2015-08-28	Purple Tansy	2	NA	NA	NA	NA	NA	NA	525	NA	NA
2015-08-28	Purple Tansy	3	NA	NA	NA	NA	NA	NA	501	NA	NA
2015-08-28	Purple Tansy	4	NA	NA	NA	NA	NA	NA	527	NA	NA
2015-08-28	Purple Tansy	5	NA	NA	NA	NA	NA	NA	502	NA	NA
2015-08-28	Purple Tansy	6	NA	NA	NA	NA	NA	NA	510	NA	NA
2015-08-28	Purple Tansy	7	NA	NA	NA	NA	NA	NA	517	NA	NA
2015-08-28	Purple Tansy	8	NA	NA	NA	NA	NA	NA	504	NA	NA
2015-08-28	Purple Tansy	9	NA	NA	NA	NA	NA	NA	503	NA	NA
2015-08-28	Purple Tansy	10	NA	NA	NA	NA	NA	NA	529	NA	NA
2015-08-31	Purple Tansy	1	NA	NA	NA	NA	NA	NA	535	NA	NA
2015-08-31	Purple Tansy	2	NA	NA	NA	NA	NA	NA	537	NA	NA
2015-08-31	Purple Tansy	3	NA	NA	NA	NA	NA	NA	506	NA	NA
2015-08-31	Purple Tansy	4	NA	NA	NA	NA	NA	NA	534	NA	NA
2015-08-31	Purple Tansy	5	NA	NA	NA	NA	NA	NA	513	NA	NA
2015-08-31	Purple Tansy	6	NA	NA	NA	NA	NA	NA	515	NA	NA
2015-08-31	Purple Tansy	7	NA	NA	NA	NA	NA	NA	525	NA	NA
2015-08-31	Purple Tansy	8	NA	NA	NA	NA	NA	NA	512	NA	NA
2015-08-31	Purple Tansy	9	NA	NA	NA	NA	NA	NA	513	NA	NA
2015-08-31	Purple Tansy	10	NA	NA	NA	NA	NA	NA	540	NA	NA
2015-09-04	Purple Tansy	1	NA	NA	NA	NA	NA	NA	545	NA	NA
2015-09-04	Purple Tansy	2	NA	NA	NA	NA	NA	NA	549	NA	NA
2015-09-04	Purple Tansy	3	NA	NA	NA	NA	NA	NA	513	NA	NA
2015-09-04	Purple Tansy	4	NA	NA	NA	NA	NA	NA	546	NA	NA
2015-09-04	Purple Tansy	5	NA	NA	NA	NA	NA	NA	526	NA	NA
2015-09-04	Purple Tansy	6	NA	NA	NA	NA	NA	NA	531	NA	NA
2015-09-04	Purple Tansy	7	NA	NA	NA	NA	NA	NA	532	NA	NA
2015-09-04	Purple Tansy	8	NA	NA	NA	NA	NA	NA	525	NA	NA
2015-09-04	Purple Tansy	9	NA	NA	NA	NA	NA	NA	533	NA	NA
2015-09-04	Purple Tansy	10	NA	NA	NA	NA	NA	NA	563	NA	NA
2015-09-07	Purple Tansy	1	NA	NA	NA	NA	NA	NA	547	NA	NA
2015-09-07	Purple Tansy	2	NA	NA	NA	NA	NA	NA	559	NA	NA
2015-09-07	Purple Tansy	3	NA	NA	NA	NA	NA	NA	522	NA	NA
2015-09-07	Purple Tansy	4	NA	NA	NA	NA	NA	NA	560	NA	NA
2015-09-07	Purple Tansy	5	NA	NA	NA	NA	NA	NA	537	NA	NA
2015-09-07	Purple Tansy	6	NA	NA	NA	NA	NA	NA	540	NA	NA
2015-09-07	Purple Tansy	7	NA	NA	NA	NA	NA	NA	536	NA	NA
2015-09-07	Purple Tansy	8	NA	NA	NA	NA	NA	NA	529	NA	NA
2015-09-07	Purple Tansy	9	NA	NA	NA	NA	NA	NA	542	NA	NA
2015-09-07	Purple Tansy	10	NA	NA	NA	NA	NA	NA	576	NA	NA
2015-09-11	Purple Tansy	1	NA	NA	NA	NA	NA	NA	561	NA	NA
2015-09-11	Purple Tansy	2	NA	NA	NA	NA	NA	NA	573	NA	NA
2015-09-11	Purple Tansy	3	NA	NA	NA	NA	NA	NA	529	NA	NA
2015-09-11	Purple Tansy	4	NA	NA	NA	NA	NA	NA	571	NA	NA
2015-09-11	Purple Tansy	5	NA	NA	NA	NA	NA	NA	541	NA	NA
2015-09-11	Purple Tansy	6	NA	NA	NA	NA	NA	NA	549	NA	NA
2015-09-11	Purple Tansy	7	NA	NA	NA	NA	NA	NA	544	NA	NA
2015-09-11	Purple Tansy	8	NA	NA	NA	NA	NA	NA	539	NA	NA
2015-09-11	Purple Tansy	9	NA	NA	NA	NA	NA	NA	543	NA	NA
2015-09-11	Purple Tansy	10	NA	NA	NA	NA	NA	NA	591	NA	NA
2015-09-14	Purple Tansy	1	NA	NA	NA	NA	NA	NA	586	NA	NA
2015-09-14	Purple Tansy	2	NA	NA	NA	NA	NA	NA	599	NA	NA
2015-09-14	Purple Tansy	3	NA	NA	NA	NA	NA	NA	545	NA	NA
2015-09-14	Purple Tansy	4	NA	NA	NA	NA	NA	NA	596	NA	NA
2015-09-14	Purple Tansy	5	NA	NA	NA	NA	NA	NA	573	NA	NA
2015-09-14	Purple Tansy	6	NA	NA	NA	NA	NA	NA	583	NA	NA
2015-09-14	Purple Tansy	7	NA	NA	NA	NA	NA	NA	558	NA	NA
2015-09-14	Purple Tansy	8	NA	NA	NA	NA	NA	NA	555	NA	NA
2015-09-14	Purple Tansy	9	NA	NA	NA	NA	NA	NA	550	NA	NA
2015-09-14	Purple Tansy	10	NA	NA	NA	NA	NA	NA	611	NA	NA
2015-09-18	Purple Tansy	1	NA	NA	NA	NA	NA	NA	612	NA	NA
2015-09-18	Purple Tansy	2	NA	NA	NA	NA	NA	NA	627	NA	NA
2015-09-18	Purple Tansy	3	NA	NA	NA	NA	NA	NA	570	NA	NA
2015-09-18	Purple Tansy	4	NA	NA	NA	NA	NA	NA	625	NA	NA
2015-09-18	Purple Tansy	5	NA	NA	NA	NA	NA	NA	607	NA	NA
2015-09-18	Purple Tansy	6	NA	NA	NA	NA	NA	NA	616	NA	NA
2015-09-18	Purple Tansy	7	NA	NA	NA	NA	NA	NA	576	NA	NA
2015-09-18	Purple Tansy	8	NA	NA	NA	NA	NA	NA	574	NA	NA
2015-09-18	Purple Tansy	9	NA	NA	NA	NA	NA	NA	568	NA	NA
2015-09-18	Purple Tansy	10	NA	NA	NA	NA	NA	NA	641	NA	NA
2015-09-22	Purple Tansy	1	NA	NA	NA	NA	NA	NA	644	NA	NA
2015-09-22	Purple Tansy	2	NA	NA	NA	NA	NA	NA	669	NA	NA
2015-09-22	Purple Tansy	3	NA	NA	NA	NA	NA	NA	587	NA	NA
2015-09-22	Purple Tansy	4	NA	NA	NA	NA	NA	NA	687	NA	NA
2015-09-22	Purple Tansy	5	NA	NA	NA	NA	NA	NA	641	NA	NA
2015-09-22	Purple Tansy	6	NA	NA	NA	NA	NA	NA	650	NA	NA
2015-09-22	Purple Tansy	7	NA	NA	NA	NA	NA	NA	597	NA	NA
2015-09-22	Purple Tansy	8	NA	NA	NA	NA	NA	NA	584	NA	NA
2015-09-22	Purple Tansy	9	NA	NA	NA	NA	NA	NA	604	NA	NA
2015-09-22	Purple Tansy	10	NA	NA	NA	NA	NA	NA	681	NA	NA
2015-09-24	Purple Tansy	1	NA	NA	NA	NA	NA	NA	650	NA	NA
2015-09-24	Purple Tansy	2	NA	NA	NA	NA	NA	NA	669	NA	NA
2015-09-24	Purple Tansy	3	NA	NA	NA	NA	NA	NA	598	NA	NA
2015-09-24	Purple Tansy	4	NA	NA	NA	NA	NA	NA	700	NA	NA
2015-09-24	Purple Tansy	5	NA	NA	NA	NA	NA	NA	655	NA	NA
2015-09-24	Purple Tansy	6	NA	NA	NA	NA	NA	NA	662	NA	NA
2015-09-24	Purple Tansy	7	NA	NA	NA	NA	NA	NA	605	NA	NA
2015-09-24	Purple Tansy	8	NA	NA	NA	NA	NA	NA	593	NA	NA
2015-09-24	Purple Tansy	9	NA	NA	NA	NA	NA	NA	608	NA	NA
2015-09-24	Purple Tansy	10	NA	NA	NA	NA	NA	NA	702	NA	NA
2015-09-28	Purple Tansy	1	NA	NA	NA	NA	NA	NA	678	NA	NA
2015-09-28	Purple Tansy	2	NA	NA	NA	NA	NA	NA	697	NA	NA
2015-09-28	Purple Tansy	3	NA	NA	NA	NA	NA	NA	630	NA	NA
2015-09-28	Purple Tansy	4	NA	NA	NA	NA	NA	NA	752	NA	NA
2015-09-28	Purple Tansy	5	NA	NA	NA	NA	NA	NA	695	NA	NA
2015-09-28	Purple Tansy	6	NA	NA	NA	NA	NA	NA	654	NA	NA
2015-09-28	Purple Tansy	7	NA	NA	NA	NA	NA	NA	617	NA	NA
2015-09-28	Purple Tansy	8	NA	NA	NA	NA	NA	NA	609	NA	NA
2015-09-28	Purple Tansy	9	NA	NA	NA	NA	NA	NA	628	NA	NA
2015-09-28	Purple Tansy	10	NA	NA	NA	NA	NA	NA	733	NA	NA
2015-10-02	Purple Tansy	1	NA	NA	NA	NA	NA	NA	687	NA	NA
2015-10-02	Purple Tansy	2	NA	NA	NA	NA	NA	NA	720	NA	NA
2015-10-02	Purple Tansy	3	NA	NA	NA	NA	NA	NA	647	NA	NA
2015-10-02	Purple Tansy	4	NA	NA	NA	NA	NA	NA	769	NA	NA
2015-10-02	Purple Tansy	5	NA	NA	NA	NA	NA	NA	715	NA	NA
2015-10-02	Purple Tansy	6	NA	NA	NA	NA	NA	NA	662	NA	NA
2015-10-02	Purple Tansy	7	NA	NA	NA	NA	NA	NA	634	NA	NA
2015-10-02	Purple Tansy	8	NA	NA	NA	NA	NA	NA	610	NA	NA
2015-10-02	Purple Tansy	9	NA	NA	NA	NA	NA	NA	653	NA	NA
2015-10-02	Purple Tansy	10	NA	NA	NA	NA	NA	NA	773	NA	NA
2015-10-05	Purple Tansy	1	NA	NA	NA	NA	NA	NA	698	NA	NA
2015-10-05	Purple Tansy	2	NA	NA	NA	NA	NA	NA	738	NA	NA
2015-10-05	Purple Tansy	3	NA	NA	NA	NA	NA	NA	675	NA	NA
2015-10-05	Purple Tansy	4	NA	NA	NA	NA	NA	NA	788	NA	NA
2015-10-05	Purple Tansy	5	NA	NA	NA	NA	NA	NA	739	NA	NA
2015-10-05	Purple Tansy	6	NA	NA	NA	NA	NA	NA	683	NA	NA
2015-10-05	Purple Tansy	7	NA	NA	NA	NA	NA	NA	642	NA	NA
2015-10-05	Purple Tansy	8	NA	NA	NA	NA	NA	NA	610	NA	NA
2015-10-05	Purple Tansy	9	NA	NA	NA	NA	NA	NA	674	NA	NA
2015-10-05	Purple Tansy	10	NA	NA	NA	NA	NA	NA	804	NA	NA
2015-10-09	Purple Tansy	3	NA	NA	NA	NA	NA	NA	711	NA	NA
2015-10-09	Purple Tansy	6	NA	NA	NA	NA	NA	NA	703	NA	NA
2015-10-09	Purple Tansy	9	NA	NA	NA	NA	NA	NA	684	NA	NA
2015-10-09	Purple Tansy	10	NA	NA	NA	NA	NA	NA	814	NA	NA
2015-10-12	Purple Tansy	3	NA	NA	NA	NA	NA	NA	736	NA	NA
2015-10-12	Purple Tansy	6	NA	NA	NA	NA	NA	NA	717	NA	NA
2015-10-12	Purple Tansy	9	NA	NA	NA	NA	NA	NA	704	NA	NA
2015-10-12	Purple Tansy	10	NA	NA	NA	NA	NA	NA	829	NA	NA
2015-10-16	Purple Tansy	3	NA	NA	NA	NA	NA	NA	761	NA	NA
2015-10-16	Purple Tansy	10	NA	NA	NA	NA	NA	NA	844	NA	NA

## Sheet: Colony Dissections Counts
Table 2. Total number of immature and adult Bombus impatiens individuals per colony counted during colony dissection. Colonies were confined to flowering plots of buckwheat, red clover, or purple tansy for 16 days and then maintained in a growth cabinet. Two weeks after the first emergence of a new queen, colonies were frozen and dissected. Counts include individuals that appeared to have been al…
Date	Treatment	Plot	Observer	Eggs	Larvae	Queen Adults	Worker Adults	Male Adults	Queen Pupae	Male/Worker Pupae
2015-10-07	Purple Tansy	1	AG	32	72	19	59	28	0	43
2015-10-14	Purple Tansy	2	AG	31	189	8	101	47	0	56
2015-10-19	Purple Tansy	3	AG	46	133	0	189	0	0	43
2015-10-16	Purple Tansy	4	AG	25	115	0	181	174	1	68
2015-10-13	Purple Tansy	5	AG	24	94	3	154	0	7	17
2015-10-15	Purple Tansy	6	AG	48	143	13	90	29	2	46
2015-10-13	Purple Tansy	7	AG	27	63	8	73	0	14	10
2015-10-13	Purple Tansy	8	AG	31	10	19	47	0	15	1
2015-10-18	Purple Tansy	9	PL	40	104	16	96	42	0	47
2015-10-19	Purple Tansy	10	AG	12	52	21	89	9	2	19
2015-10-18	Red Clover	1	PL	56	118	1	43	89	0	52
2015-10-01	Red Clover	2	PL	10	103	3	66	38	0	19
2015-10-15	Red Clover	3	AG	22	72	2	29	81	0	27
2015-10-13	Red Clover	4	PL	24	36	0	15	76	0	7
2015-10-15	Red Clover	5	TB	53	116	0	30	50	0	57
2015-10-14	Red Clover	6	AG	10	3	27	16	0	2	8
2015-10-13	Red Clover	7	PL	25	1	1	6	26	0	2
2015-10-06	Red Clover	8	AG	10	66	11	40	31	0	29
2015-10-07	Red Clover	9	AG	7	36	7	20	0	2	2
2015-10-07	Red Clover	10	AG	24	43	20	34	7	5	14
2015-10-01	Buckwheat	1	AG	30	93	12	18	13	0	45
2015-10-01	Buckwheat	2	TC	35	107	2	13	2	6	32
2015-10-19	Buckwheat	3	AG	46	59	14	138	11	21	32
2015-10-14	Buckwheat	4	AG	15	99	4	40	60	0	50
2015-10-16	Buckwheat	5	AG	29	41	28	30	3	3	15
2015-10-13	Buckwheat	6	AG	47	139	3	93	80	0	54
2015-10-16	Buckwheat	7	AG	49	171	3	36	66	0	40
2015-09-24	Buckwheat	8	PL	39	80	7	73	1	2	35
2015-10-15	Buckwheat	9	AG	0	87	10	56	46	0	50
2015-09-22	Buckwheat	10	PL	0	51	5	63	1	1	6

## Sheet: Colony Dissections Adult Weight
Table 3. Weight (g) of individual Bombus impatiens queen, male, and worker adults per colony. Colonies were confined to flowering plots of buckwheat, red clover, or purple tansy for 16 days and then maintained in a growth cabinet until 2 weeks after the emergence of a new queen. All new queens in each colony were weighed. If a colony contained more than 20 males or workers, a random sample of 20 …
Date	Treatment	Plot	Queen Weights (g)	Male Weights (g)	Worker Weights (g)
2015-10-07	Purple Tansy	1	0.6757	0.207	0.0867
2015-10-07	Purple Tansy	1	0.5607	0.1305	0.2322
2015-10-07	Purple Tansy	1	0.6781	0.1952	0.1631
2015-10-07	Purple Tansy	1	0.8391	0.189	0.2844
2015-10-07	Purple Tansy	1	0.7942	0.1307	0.1547
2015-10-07	Purple Tansy	1	0.5429	0.1977	0.1064
2015-10-07	Purple Tansy	1	0.5831	0.1654	0.2099
2015-10-07	Purple Tansy	1	0.6549	0.1516	0.0879
2015-10-07	Purple Tansy	1	0.6547	0.2051	0.0805
2015-10-07	Purple Tansy	1	0.7095	0.1326	0.1074
2015-10-07	Purple Tansy	1	0.5066	0.1469	0.1068
2015-10-07	Purple Tansy	1	0.5702	0.0906	0.1642
2015-10-07	Purple Tansy	1	0.6073	0.2058	0.1732
2015-10-07	Purple Tansy	1	0.6191	0.107	0.2237
2015-10-07	Purple Tansy	1	0.9141	0.1285	0.0578
2015-10-07	Purple Tansy	1	0.725	0.1488	0.2254
2015-10-07	Purple Tansy	1	0.6285	0.1612	0.3783
2015-10-07	Purple Tansy	1	0.8193	0.1779	0.0847
2015-10-07	Purple Tansy	1	0.6138	0.1698	0.1925
2015-10-07	Purple Tansy	1	0.7007	0.2282	0.0998
2015-10-14	Purple Tansy	2	0.595	0.1866	0.3547
2015-10-14	Purple Tansy	2	0.6531	0.1657	0.2036
2015-10-14	Purple Tansy	2	0.6466	0.179	0.2013
2015-10-14	Purple Tansy	2	0.639	0.1633	0.0985
2015-10-14	Purple Tansy	2	0.6141	0.1452	0.146
2015-10-14	Purple Tansy	2	0.6841	0.1921	0.0936
2015-10-14	Purple Tansy	2	0.6534	0.1738	0.1943
2015-10-14	Purple Tansy	2	0.7044	0.185	0.2389
2015-10-14	Purple Tansy	2	NA	0.1514	0.1769
2015-10-14	Purple Tansy	2	NA	0.2035	0.133
2015-10-14	Purple Tansy	2	NA	0.1261	0.15
2015-10-14	Purple Tansy	2	NA	0.186	0.1063
2015-10-14	Purple Tansy	2	NA	0.213	0.1275
2015-10-14	Purple Tansy	2	NA	0.1797	0.0908
2015-10-14	Purple Tansy	2	NA	0.1724	0.1791
2015-10-14	Purple Tansy	2	NA	0.1318	0.1409
2015-10-14	Purple Tansy	2	NA	0.1803	0.1769
2015-10-14	Purple Tansy	2	NA	0.176	0.0838
2015-10-14	Purple Tansy	2	NA	0.1827	0.1346
2015-10-14	Purple Tansy	2	NA	0.2071	0.1736
2015-10-19	Purple Tansy	3	NA	NA	0.1662
2015-10-19	Purple Tansy	3	NA	NA	0.135
2015-10-19	Purple Tansy	3	NA	NA	0.1664
2015-10-19	Purple Tansy	3	NA	NA	0.175
2015-10-19	Purple Tansy	3	NA	NA	0.1444
2015-10-19	Purple Tansy	3	NA	NA	0.1421
2015-10-19	Purple Tansy	3	NA	NA	0.2296
2015-10-19	Purple Tansy	3	NA	NA	0.1621
2015-10-19	Purple Tansy	3	NA	NA	0.0887
2015-10-19	Purple Tansy	3	NA	NA	0.1501
2015-10-19	Purple Tansy	3	NA	NA	0.2914
2015-10-19	Purple Tansy	3	NA	NA	0.2393
2015-10-19	Purple Tansy	3	NA	NA	0.199
2015-10-19	Purple Tansy	3	NA	NA	0.1297
2015-10-19	Purple Tansy	3	NA	NA	0.1688
2015-10-19	Purple Tansy	3	NA	NA	0.1473
2015-10-19	Purple Tansy	3	NA	NA	0.1193
2015-10-19	Purple Tansy	3	NA	NA	0.1403
2015-10-19	Purple Tansy	3	NA	NA	0.1236
2015-10-19	Purple Tansy	3	NA	NA	0.1327
2015-10-16	Purple Tansy	4	NA	0.754	0.2041
2015-10-16	Purple Tansy	4	NA	0.1236	0.1157
2015-10-16	Purple Tansy	4	NA	0.1823	0.1549
2015-10-16	Purple Tansy	4	NA	0.1738	0.1161
2015-10-16	Purple Tansy	4	NA	0.1621	0.1056
2015-10-16	Purple Tansy	4	NA	0.085	0.1715
2015-10-16	Purple Tansy	4	NA	0.1388	0.1591
2015-10-16	Purple Tansy	4	NA	0.1586	0.1536
2015-10-16	Purple Tansy	4	NA	0.1697	0.1789
2015-10-16	Purple Tansy	4	NA	0.157	0.0957
2015-10-16	Purple Tansy	4	NA	0.1428	0.1962
2015-10-16	Purple Tansy	4	NA	0.1629	0.2191
2015-10-16	Purple Tansy	4	NA	0.1537	0.1982
2015-10-16	Purple Tansy	4	NA	0.1602	0.1536
2015-10-16	Purple Tansy	4	NA	0.1338	0.153
2015-10-16	Purple Tansy	4	NA	0.1727	0.1628
2015-10-16	Purple Tansy	4	NA	0.1361	0.1418
2015-10-16	Purple Tansy	4	NA	0.0997	0.1692
2015-10-16	Purple Tansy	4	NA	0.1568	0.1119
2015-10-16	Purple Tansy	4	NA	0.1325	0.0937
2015-10-13	Purple Tansy	5	0.5539	NA	0.1871
2015-10-13	Purple Tansy	5	0.5596	NA	0.1266
2015-10-13	Purple Tansy	5	0.503	NA	0.1842
2015-10-13	Purple Tansy	5	NA	NA	0.1055
2015-10-13	Purple Tansy	5	NA	NA	0.2253
2015-10-13	Purple Tansy	5	NA	NA	0.1848
2015-10-13	Purple Tansy	5	NA	NA	0.0366
2015-10-13	Purple Tansy	5	NA	NA	0.1864
2015-10-13	Purple Tansy	5	NA	NA	0.1402
2015-10-13	Purple Tansy	5	NA	NA	0.2173
2015-10-13	Purple Tansy	5	NA	NA	0.2091
2015-10-13	Purple Tansy	5	NA	NA	0.2504
2015-10-13	Purple Tansy	5	NA	NA	0.086
2015-10-13	Purple Tansy	5	NA	NA	0.2005
2015-10-13	Purple Tansy	5	NA	NA	0.1101
2015-10-13	Purple Tansy	5	NA	NA	0.1499
2015-10-13	Purple Tansy	5	NA	NA	0.1744
2015-10-13	Purple Tansy	5	NA	NA	0.0588
2015-10-13	Purple Tansy	5	NA	NA	0.1704
2015-10-13	Purple Tansy	5	NA	NA	0.3425
2015-10-15	Purple Tansy	6	0.3694	0.1496	0.1027
2015-10-15	Purple Tansy	6	0.445	0.2869	0.2336
2015-10-15	Purple Tansy	6	0.5362	0.2459	0.1353
2015-10-15	Purple Tansy	6	0.765	0.1716	0.1183
2015-10-15	Purple Tansy	6	0.6195	0.1748	0.1005
2015-10-15	Purple Tansy	6	0.4661	0.1744	0.1252
2015-10-15	Purple Tansy	6	0.6412	0.1636	0.2741
2015-10-15	Purple Tansy	6	0.6512	0.2234	0.2142
2015-10-15	Purple Tansy	6	0.615	0.1798	0.1818
2015-10-15	Purple Tansy	6	0.5712	0.2041	0.2288
2015-10-15	Purple Tansy	6	0.7761	0.235	0.123
2015-10-15	Purple Tansy	6	0.5315	0.1594	0.1068
2015-10-15	Purple Tansy	6	0.5135	0.132	0.1655
2015-10-15	Purple Tansy	6	NA	0.1708	0.0925
2015-10-15	Purple Tansy	6	NA	0.165	0.2876
2015-10-15	Purple Tansy	6	NA	0.1387	0.1696
2015-10-15	Purple Tansy	6	NA	0.1998	0.1615
2015-10-15	Purple Tansy	6	NA	0.1728	0.1008
2015-10-15	Purple Tansy	6	NA	0.2569	0.2396
2015-10-15	Purple Tansy	6	NA	0.1477	0.1081
2015-10-13	Purple Tansy	7	0.7812	NA	0.2269
2015-10-13	Purple Tansy	7	0.5734	NA	0.1267
2015-10-13	Purple Tansy	7	0.6445	NA	0.1802
2015-10-13	Purple Tansy	7	0.5303	NA	0.132
2015-10-13	Purple Tansy	7	0.5791	NA	0.1767
2015-10-13	Purple Tansy	7	0.6492	NA	0.1048
2015-10-13	Purple Tansy	7	0.6671	NA	0.1007
2015-10-13	Purple Tansy	7	0.4881	NA	0.156
2015-10-13	Purple Tansy	7	NA	NA	0.2125
2015-10-13	Purple Tansy	7	NA	NA	0.2668
2015-10-13	Purple Tansy	7	NA	NA	0.1853
2015-10-13	Purple Tansy	7	NA	NA	0.3209
2015-10-13	Purple Tansy	7	NA	NA	0.2727
2015-10-13	Purple Tansy	7	NA	NA	0.1317
2015-10-13	Purple Tansy	7	NA	NA	0.1281
2015-10-13	Purple Tansy	7	NA	NA	0.1028
2015-10-13	Purple Tansy	7	NA	NA	0.1228
2015-10-13	Purple Tansy	7	NA	NA	0.1496
2015-10-13	Purple Tansy	7	NA	NA	0.0769
2015-10-13	Purple Tansy	7	NA	NA	0.1766
2015-10-13	Purple Tansy	8	0.525	0.0999	0.0712
2015-10-13	Purple Tansy	8	0.6935	0.0417	0.087
2015-10-13	Purple Tansy	8	0.8033	NA	0.3302
2015-10-13	Purple Tansy	8	0.5658	NA	0.1639
2015-10-13	Purple Tansy	8	0.564	NA	0.0761
2015-10-13	Purple Tansy	8	0.527	NA	0.1006
2015-10-13	Purple Tansy	8	0.3949	NA	0.1733
2015-10-13	Purple Tansy	8	0.6032	NA	0.1045
2015-10-13	Purple Tansy	8	0.5058	NA	0.0516
2015-10-13	Purple Tansy	8	0.6404	NA	0.2887
2015-10-13	Purple Tansy	8	0.7323	NA	0.3519
2015-10-13	Purple Tansy	8	0.5867	NA	0.0921
2015-10-13	Purple Tansy	8	0.5125	NA	0.1327
2015-10-13	Purple Tansy	8	0.6925	NA	0.1297
2015-10-13	Purple Tansy	8	0.6862	NA	0.0751
2015-10-13	Purple Tansy	8	0.6129	NA	0.1339
2015-10-13	Purple Tansy	8	0.721	NA	0.2484
2015-10-13	Purple Tansy	8	0.4482	NA	0.1232
2015-10-13	Purple Tansy	8	NA	NA	0.3153
2015-10-13	Purple Tansy	8	NA	NA	0.368
2015-10-18	Purple Tansy	9	0.6241	0.1422	0.08
2015-10-18	Purple Tansy	9	0.3306	0.123	0.1655
2015-10-18	Purple Tansy	9	0.4921	0.1201	0.1819
2015-10-18	Purple Tansy	9	0.4058	0.1678	0.1509
2015-10-18	Purple Tansy	9	0.614	0.1074	0.1359
2015-10-18	Purple Tansy	9	0.4698	0.1323	0.1112
2015-10-18	Purple Tansy	9	0.7278	0.107	0.1473
2015-10-18	Purple Tansy	9	0.594	0.1136	0.1752
2015-10-18	Purple Tansy	9	0.4842	0.135	0.1241
2015-10-18	Purple Tansy	9	0.4891	0.158	0.1402
2015-10-18	Purple Tansy	9	0.3962	0.1663	0.1694
2015-10-18	Purple Tansy	9	0.4687	0.1462	0.1324
2015-10-18	Purple Tansy	9	0.4592	0.1216	0.1703
2015-10-18	Purple Tansy	9	0.5762	0.1233	0.2203
2015-10-18	Purple Tansy	9	0.3901	0.1641	0.1716
2015-10-18	Purple Tansy	9	0.2947	0.1341	0.1599
2015-10-18	Purple Tansy	9	NA	0.1132	0.1389
2015-10-18	Purple Tansy	9	NA	0.1174	0.1241
2015-10-18	Purple Tansy	9	NA	0.124	0.161
2015-10-18	Purple Tansy	9	NA	0.1174	0.133
2015-10-19	Purple Tansy	10	0.4303	0.1907	0.0978
2015-10-19	Purple Tansy	10	0.7519	0.2326	0.1666
2015-10-19	Purple Tansy	10	0.7666	0.2265	0.1617
2015-10-19	Purple Tansy	10	0.7045	0.2385	0.18
2015-10-19	Purple Tansy	10	0.7528	0.195	0.1968
2015-10-19	Purple Tansy	10	0.6528	0.1914	0.184
2015-10-19	Purple Tansy	10	0.8336	0.1965	0.3245
2015-10-19	Purple Tansy	10	0.7601	0.1771	0.1239
2015-10-19	Purple Tansy	10	0.8205	0.1865	0.1892
2015-10-19	Purple Tansy	10	0.67015	NA	0.0777
2015-10-19	Purple Tansy	10	0.9028	NA	0.2176
2015-10-19	Purple Tansy	10	0.6308	NA	0.1504
2015-10-19	Purple Tansy	10	0.6862	NA	0.1541
2015-10-19	Purple Tansy	10	0.7944	NA	0.1435
2015-10-19	Purple Tansy	10	0.8065	NA	0.1505
2015-10-19	Purple Tansy	10	0.7443	NA	0.17
2015-10-19	Purple Tansy	10	0.757	NA	0.1553
2015-10-19	Purple Tansy	10	0.5973	NA	0.1244
2015-10-19	Purple Tansy	10	0.7869	NA	0.1584
2015-10-19	Purple Tansy	10	0.631	NA	0.1275
2015-10-19	Purple Tansy	10	0.7925	NA	0.1029
2015-10-18	Red Clover	1	0.6531	0.2145	0.1639
2015-10-18	Red Clover	1	NA	0.1735	0.0806
2015-10-18	Red Clover	1	NA	0.2505	0.1884
2015-10-18	Red Clover	1	NA	0.1587	0.135
2015-10-18	Red Clover	1	NA	0.2318	0.0239
2015-10-18	Red Clover	1	NA	0.2353	0.1674
2015-10-18	Red Clover	1	NA	0.2444	0.1983
2015-10-18	Red Clover	1	NA	0.2169	0.0738
2015-10-18	Red Clover	1	NA	0.2302	0.0972
2015-10-18	Red Clover	1	NA	0.1373	0.1668
2015-10-18	Red Clover	1	NA	0.1459	0.1717
2015-10-18	Red Clover	1	NA	0.1311	0.106
2015-10-18	Red Clover	1	NA	0.207	0.1592
2015-10-18	Red Clover	1	NA	0.1857	0.0857
2015-10-18	Red Clover	1	NA	0.2162	0.105
2015-10-18	Red Clover	1	NA	0.2543	0.0733
2015-10-18	Red Clover	1	NA	0.1991	0.1118
2015-10-18	Red Clover	1	NA	0.2359	0.12
2015-10-18	Red Clover	1	NA	0.1368	0.1352
2015-10-18	Red Clover	1	NA	0.2008	0.1014
2015-10-01	Red Clover	2	0.569	0.107	0.0389
2015-10-01	Red Clover	2	0.5471	0.1637	0.0479
2015-10-01	Red Clover	2	0.5468	0.1966	0.0316
2015-10-01	Red Clover	2	NA	0.1678	0.185
2015-10-01	Red Clover	2	NA	0.1736	0.0634
2015-10-01	Red Clover	2	NA	0.2058	0.0856
2015-10-01	Red Clover	2	NA	0.1303	0.0505
2015-10-01	Red Clover	2	NA	0.1308	0.1723
2015-10-01	Red Clover	2	NA	0.1544	0.0343
2015-10-01	Red Clover	2	NA	0.1698	0.1131
2015-10-01	Red Clover	2	NA	0.2063	0.1602
2015-10-01	Red Clover	2	NA	0.1606	0.0807
2015-10-01	Red Clover	2	NA	0.1706	0.2006
2015-10-01	Red Clover	2	NA	0.2243	0.1456
2015-10-01	Red Clover	2	NA	0.151	0.1888
2015-10-01	Red Clover	2	NA	0.1558	0.1645
2015-10-01	Red Clover	2	NA	0.1749	0.1423
2015-10-01	Red Clover	2	NA	0.1781	0.2086
2015-10-01	Red Clover	2	NA	0.2044	0.1297
2015-10-01	Red Clover	2	NA	0.1549	0.1434
2015-10-15	Red Clover	3	0.7878	0.1536	0.0952
2015-10-15	Red Clover	3	0.8306	0.1826	0.1802
2015-10-15	Red Clover	3	NA	0.1983	0.1775
2015-10-15	Red Clover	3	NA	0.2061	0.0889
2015-10-15	Red Clover	3	NA	0.2159	0.1399
2015-10-15	Red Clover	3	NA	0.1308	0.2122
2015-10-15	Red Clover	3	NA	0.194	0.1555
2015-10-15	Red Clover	3	NA	0.1946	0.0835
2015-10-15	Red Clover	3	NA	0.1611	0.0879
2015-10-15	Red Clover	3	NA	0.2298	0.1524
2015-10-15	Red Clover	3	NA	0.257	0.1921
2015-10-15	Red Clover	3	NA	0.1756	0.1731
2015-10-15	Red Clover	3	NA	0.1716	0.1517
2015-10-15	Red Clover	3	NA	0.1455	0.1303
2015-10-15	Red Clover	3	NA	0.1808	0.1718
2015-10-15	Red Clover	3	NA	0.1076	0.1386
2015-10-15	Red Clover	3	NA	0.206	0.096
2015-10-15	Red Clover	3	NA	0.2214	0.1654
2015-10-15	Red Clover	3	NA	0.0993	0.0948
2015-10-15	Red Clover	3	NA	0.1874	0.1801
2015-10-13	Red Clover	4	NA	0.154	0.1448
2015-10-13	Red Clover	4	NA	0.1859	0.1278
2015-10-13	Red Clover	4	NA	0.2177	0.1002
2015-10-13	Red Clover	4	NA	0.1988	0.1138
2015-10-13	Red Clover	4	NA	0.1567	0.144
2015-10-13	Red Clover	4	NA	0.1651	0.1506
2015-10-13	Red Clover	4	NA	0.1178	0.1342
2015-10-13	Red Clover	4	NA	0.1328	0.1388
2015-10-13	Red Clover	4	NA	0.2282	0.1951
2015-10-13	Red Clover	4	NA	0.1626	0.1112
2015-10-13	Red Clover	4	NA	0.1857	0.0411
2015-10-13	Red Clover	4	NA	0.148	0.1711
2015-10-13	Red Clover	4	NA	0.168	0.1044
2015-10-13	Red Clover	4	NA	0.1758	0.2279
2015-10-13	Red Clover	4	NA	0.1508	0.1204
2015-10-13	Red Clover	4	NA	0.1662	NA
2015-10-13	Red Clover	4	NA	0.2131	NA
2015-10-13	Red Clover	4	NA	0.1176	NA
2015-10-13	Red Clover	4	NA	0.205	NA
2015-10-13	Red Clover	4	NA	0.1807	NA
2015-10-15	Red Clover	5	NA	0.2572	0.2366
2015-10-15	Red Clover	5	NA	0.1092	0.1469
2015-10-15	Red Clover	5	NA	0.2462	0.1462
2015-10-15	Red Clover	5	NA	0.1591	0.1264
2015-10-15	Red Clover	5	NA	0.1426	0.1674
2015-10-15	Red Clover	5	NA	0.253	0.1128
2015-10-15	Red Clover	5	NA	0.1509	0.169
2015-10-15	Red Clover	5	NA	0.2163	0.1552
2015-10-15	Red Clover	5	NA	0.1822	0.1421
2015-10-15	Red Clover	5	NA	0.2321	0.1842
2015-10-15	Red Clover	5	NA	0.1753	0.1216
2015-10-15	Red Clover	5	NA	0.2458	0.2496
2015-10-15	Red Clover	5	NA	0.1872	0.1122
2015-10-15	Red Clover	5	NA	0.2129	0.1871
2015-10-15	Red Clover	5	NA	0.1294	0.0959
2015-10-15	Red Clover	5	NA	0.2309	0.134
2015-10-15	Red Clover	5	NA	0.1687	0.1683
2015-10-15	Red Clover	5	NA	0.135	0.1782
2015-10-15	Red Clover	5	NA	0.216	0.1292
2015-10-15	Red Clover	5	NA	0.2239	0.1828
2015-10-14	Red Clover	6	0.5858	NA	0.1161
2015-10-14	Red Clover	6	0.686	NA	0.1477
2015-10-14	Red Clover	6	0.806	NA	0.1152
2015-10-14	Red Clover	6	0.7041	NA	0.0637
2015-10-14	Red Clover	6	0.7991	NA	0.117
2015-10-14	Red Clover	6	0.5914	NA	0.1326
2015-10-14	Red Clover	6	0.752	NA	0.1419
2015-10-14	Red Clover	6	0.5943	NA	0.2405
2015-10-14	Red Clover	6	0.6866	NA	0.1355
2015-10-14	Red Clover	6	0.7316	NA	0.1178
2015-10-14	Red Clover	6	0.6324	NA	0.1709
2015-10-14	Red Clover	6	0.6145	NA	0.1387
2015-10-14	Red Clover	6	0.603	NA	0.1112
2015-10-14	Red Clover	6	0.5449	NA	0.1377
2015-10-14	Red Clover	6	0.6697	NA	0.1389
2015-10-14	Red Clover	6	0.5665	NA	0.1587
2015-10-14	Red Clover	6	0.7082	NA	NA
2015-10-14	Red Clover	6	0.6048	NA	NA
2015-10-14	Red Clover	6	0.6267	NA	NA
2015-10-14	Red Clover	6	0.6797	NA	NA
2015-10-14	Red Clover	6	0.5138	NA	NA
2015-10-14	Red Clover	6	0.5092	NA	NA
2015-10-14	Red Clover	6	0.5848	NA	NA
2015-10-14	Red Clover	6	0.8276	NA	NA
2015-10-14	Red Clover	6	0.5931	NA	NA
2015-10-14	Red Clover	6	0.641	NA	NA
2015-10-14	Red Clover	6	0.4987	NA	NA
2015-10-14	Red Clover	6	0.5952	NA	NA
2015-10-13	Red Clover	7	NA	0.1697	NA
2015-10-13	Red Clover	7	NA	0.1406	0.0527
2015-10-13	Red Clover	7	NA	0.1215	0.0242
2015-10-13	Red Clover	7	NA	0.1229	0.0757
2015-10-13	Red Clover	7	NA	0.1898	0.0224
2015-10-13	Red Clover	7	NA	0.1422	0.0878
2015-10-13	Red Clover	7	NA	0.1402	0.0854
2015-10-13	Red Clover	7	NA	0.098	NA
2015-10-13	Red Clover	7	NA	0.1718	NA
2015-10-13	Red Clover	7	NA	0.1598	NA
2015-10-13	Red Clover	7	NA	0.1395	NA
2015-10-13	Red Clover	7	NA	0.159	NA
2015-10-13	Red Clover	7	NA	0.1062	NA
2015-10-13	Red Clover	7	NA	0.168	NA
2015-10-13	Red Clover	7	NA	0.1272	NA
2015-10-13	Red Clover	7	NA	0.0325	NA
2015-10-13	Red Clover	7	NA	0.0765	NA
2015-10-13	Red Clover	7	NA	0.1373	NA
2015-10-13	Red Clover	7	NA	0.0764	NA
2015-10-13	Red Clover	7	NA	0.1378	NA
2015-10-06	Red Clover	8	0.7354	0.1472	0.0719
2015-10-06	Red Clover	8	0.5863	0.2203	0.1098
2015-10-06	Red Clover	8	0.5841	0.2112	0.3567
2015-10-06	Red Clover	8	0.5802	0.1526	0.2119
2015-10-06	Red Clover	8	0.5624	0.2073	0.0544
2015-10-06	Red Clover	8	0.7564	0.1473	0.1109
2015-10-06	Red Clover	8	0.7399	0.2091	0.038
2015-10-06	Red Clover	8	0.5053	0.1574	0.0509
2015-10-06	Red Clover	8	0.7419	0.2079	0.0507
2015-10-06	Red Clover	8	0.6969	0.173	0.0495
2015-10-06	Red Clover	8	0.5535	0.1751	0.1476
2015-10-06	Red Clover	8	NA	0.1528	0.0406
2015-10-06	Red Clover	8	NA	0.1822	0.2251
2015-10-06	Red Clover	8	NA	0.2296	0.2379
2015-10-06	Red Clover	8	NA	0.1534	0.0884
2015-10-06	Red Clover	8	NA	0.161	0.1745
2015-10-06	Red Clover	8	NA	0.25	0.0794
2015-10-06	Red Clover	8	NA	0.1719	0.1753
2015-10-06	Red Clover	8	NA	0.1423	0.185
2015-10-06	Red Clover	8	NA	0.2037	0.0956
2015-10-07	Red Clover	9	0.8748	NA	0.1069
2015-10-07	Red Clover	9	0.63	NA	0.0751
2015-10-07	Red Clover	9	0.6775	NA	0.1277
2015-10-07	Red Clover	9	0.6261	NA	0.1572
2015-10-07	Red Clover	9	0.7427	NA	0.0494
2015-10-07	Red Clover	9	0.6236	NA	0.159
2015-10-07	Red Clover	9	0.6914	NA	0.1707
2015-10-07	Red Clover	9	0.1705	NA	0.1441
2015-10-07	Red Clover	9	NA	NA	0.074
2015-10-07	Red Clover	9	NA	NA	0.0738
2015-10-07	Red Clover	9	NA	NA	0.0845
2015-10-07	Red Clover	9	NA	NA	0.0585
2015-10-07	Red Clover	9	NA	NA	0.1331
2015-10-07	Red Clover	9	NA	NA	0.0838
2015-10-07	Red Clover	9	NA	NA	0.2027
2015-10-07	Red Clover	9	NA	NA	0.1223
2015-10-07	Red Clover	9	NA	NA	0.0857
2015-10-07	Red Clover	9	NA	NA	0.1069
2015-10-07	Red Clover	9	NA	NA	0.0919
2015-10-07	Red Clover	9	NA	NA	0.1064
2015-10-07	Red Clover	10	0.6803	0.1793	0.1836
2015-10-07	Red Clover	10	0.7339	0.1534	0.1105
2015-10-07	Red Clover	10	0.7532	0.1036	0.2668
2015-10-07	Red Clover	10	0.7313	0.1531	0.1134
2015-10-07	Red Clover	10	0.6151	0.0896	0.1658
2015-10-07	Red Clover	10	0.707	0.1542	0.2319
2015-10-07	Red Clover	10	0.8208	0.196	0.1814
2015-10-07	Red Clover	10	0.6066	NA	0.21
2015-10-07	Red Clover	10	0.6986	NA	0.1618
2015-10-07	Red Clover	10	0.7415	NA	0.0742
2015-10-07	Red Clover	10	0.6445	NA	0.0868
2015-10-07	Red Clover	10	0.5799	NA	0.1907
2015-10-07	Red Clover	10	0.6176	NA	0.1526
2015-10-07	Red Clover	10	0.7009	NA	0.2028
2015-10-07	Red Clover	10	0.7147	NA	0.1735
2015-10-07	Red Clover	10	0.6426	NA	0.1698
2015-10-07	Red Clover	10	0.7084	NA	0.1093
2015-10-07	Red Clover	10	0.7336	NA	0.1569
2015-10-07	Red Clover	10	0.582	NA	0.1761
2015-10-07	Red Clover	10	0.681	NA	0.1582
2015-10-01	Buckwheat	1	0.6657	0.1842	0.1656
2015-10-01	Buckwheat	1	0.6212	0.1773	0.4052
2015-10-01	Buckwheat	1	0.5283	0.2113	0.1727
2015-10-01	Buckwheat	1	0.5061	0.1837	0.1262
2015-10-01	Buckwheat	1	0.5474	0.1955	0.2275
2015-10-01	Buckwheat	1	0.4564	0.1896	0.1257
2015-10-01	Buckwheat	1	0.5941	0.184	0.1764
2015-10-01	Buckwheat	1	0.542	0.2108	0.078
2015-10-01	Buckwheat	1	0.4968	0.2066	0.1465
2015-10-01	Buckwheat	1	0.7409	0.1796	0.1765
2015-10-01	Buckwheat	1	0.502	0.198	0.1346
2015-10-01	Buckwheat	1	0.5506	0.202	0.1611
2015-10-01	Buckwheat	1	NA	0.2099	0.1817
2015-10-01	Buckwheat	1	NA	NA	0.1127
2015-10-01	Buckwheat	1	NA	NA	0.1311
2015-10-01	Buckwheat	1	NA	NA	0.0976
2015-10-01	Buckwheat	1	NA	NA	0.1031
2015-10-01	Buckwheat	1	NA	NA	0.1382
2015-10-01	Buckwheat	1	NA	NA	0.132
2015-10-01	Buckwheat	1	NA	NA	0.1421
2015-10-01	Buckwheat	2	0.5932	0.1846	0.1512
2015-10-01	Buckwheat	2	NA	0.1439	0.1836
2015-10-01	Buckwheat	2	NA	NA	0.1378
2015-10-01	Buckwheat	2	NA	NA	0.0678
2015-10-01	Buckwheat	2	NA	NA	0.0604
2015-10-01	Buckwheat	2	NA	NA	0.1468
2015-10-01	Buckwheat	2	NA	NA	0.1779
2015-10-01	Buckwheat	2	NA	NA	0.1857
2015-10-01	Buckwheat	2	NA	NA	0.1523
2015-10-01	Buckwheat	2	NA	NA	0.239
2015-10-01	Buckwheat	2	NA	NA	0.2048
2015-10-01	Buckwheat	2	NA	NA	0.2319
2015-10-01	Buckwheat	2	NA	NA	0.1135
2015-10-01	Buckwheat	2	NA	NA	0.1778
2015-10-01	Buckwheat	2	NA	NA	0.0754
2015-10-01	Buckwheat	2	NA	NA	0.1708
2015-10-01	Buckwheat	2	NA	NA	0.1254
2015-10-01	Buckwheat	2	NA	NA	0.1869
2015-10-01	Buckwheat	2	NA	NA	0.2586
2015-10-01	Buckwheat	2	NA	NA	0.1832
2015-10-19	Buckwheat	3	0.5238	0.1161	0.2054
2015-10-19	Buckwheat	3	0.5869	0.2076	0.1161
2015-10-19	Buckwheat	3	0.6763	0.1255	0.1199
2015-10-19	Buckwheat	3	0.7441	0.0976	0.1394
2015-10-19	Buckwheat	3	0.6631	0.1518	0.1654
2015-10-19	Buckwheat	3	0.5098	0.0992	0.0901
2015-10-19	Buckwheat	3	0.6751	0.216	0.2115
2015-10-19	Buckwheat	3	0.5056	0.1467	0.165
2015-10-19	Buckwheat	3	0.9189	0.1454	0.1291
2015-10-19	Buckwheat	3	0.7013	0.1586	0.1389
2015-10-19	Buckwheat	3	0.5133	0.1434	0.155
2015-10-19	Buckwheat	3	0.6605	NA	0.1171
2015-10-19	Buckwheat	3	0.6381	NA	0.1613
2015-10-19	Buckwheat	3	0.6084	NA	0.1353
2015-10-19	Buckwheat	3	NA	NA	0.1764
2015-10-19	Buckwheat	3	NA	NA	0.1802
2015-10-19	Buckwheat	3	NA	NA	0.1052
2015-10-19	Buckwheat	3	NA	NA	0.1017
2015-10-19	Buckwheat	3	NA	NA	0.0952
2015-10-19	Buckwheat	3	NA	NA	0.1508
2015-10-14	Buckwheat	4	0.4767	0.2431	0.1467
2015-10-14	Buckwheat	4	0.7256	0.1845	0.0926
2015-10-14	Buckwheat	4	0.5746	0.1753	0.1139
2015-10-14	Buckwheat	4	0.7711	0.1465	0.1429
2015-10-14	Buckwheat	4	NA	0.2283	0.096
2015-10-14	Buckwheat	4	NA	0.1728	0.2339
2015-10-14	Buckwheat	4	NA	0.2048	0.2043
2015-10-14	Buckwheat	4	NA	0.1851	0.2186
2015-10-14	Buckwheat	4	NA	0.2251	0.0909
2015-10-14	Buckwheat	4	NA	0.1769	0.3037
2015-10-14	Buckwheat	4	NA	0.2029	0.1812
2015-10-14	Buckwheat	4	NA	0.2223	0.1304
2015-10-14	Buckwheat	4	NA	0.1879	0.2589
2015-10-14	Buckwheat	4	NA	0.1607	0.1113
2015-10-14	Buckwheat	4	NA	0.1594	0.1163
2015-10-14	Buckwheat	4	NA	0.2161	0.1153
2015-10-14	Buckwheat	4	NA	0.2327	0.2751
2015-10-14	Buckwheat	4	NA	0.1726	0.1259
2015-10-14	Buckwheat	4	NA	0.1641	0.1224
2015-10-14	Buckwheat	4	NA	0.2023	0.1036
2015-10-16	Buckwheat	5	0.8304	0.1685	0.0709
2015-10-16	Buckwheat	5	0.8696	0.1593	0.0626
2015-10-16	Buckwheat	5	0.685	0.1928	0.1863
2015-10-16	Buckwheat	5	0.7955	NA	0.1572
2015-10-16	Buckwheat	5	0.7305	NA	0.0676
2015-10-16	Buckwheat	5	0.6752	NA	0.1255
2015-10-16	Buckwheat	5	0.7994	NA	0.1498
2015-10-16	Buckwheat	5	0.6947	NA	0.0983
2015-10-16	Buckwheat	5	0.8609	NA	0.1532
2015-10-16	Buckwheat	5	0.7962	NA	0.0934
2015-10-16	Buckwheat	5	0.7479	NA	0.161
2015-10-16	Buckwheat	5	0.7171	NA	0.1063
2015-10-16	Buckwheat	5	0.6942	NA	0.0875
2015-10-16	Buckwheat	5	0.8067	NA	0.0788
2015-10-16	Buckwheat	5	0.7532	NA	0.2012
2015-10-16	Buckwheat	5	0.6545	NA	0.0646
2015-10-16	Buckwheat	5	0.6106	NA	0.099
2015-10-16	Buckwheat	5	0.7332	NA	0.1963
2015-10-16	Buckwheat	5	0.9059	NA	0.1264
2015-10-16	Buckwheat	5	0.7417	NA	0.0785
2015-10-16	Buckwheat	5	0.3975	NA	NA
2015-10-16	Buckwheat	5	0.8728	NA	NA
2015-10-16	Buckwheat	5	0.673	NA	NA
2015-10-16	Buckwheat	5	0.6121	NA	NA
2015-10-16	Buckwheat	5	0.638	NA	NA
2015-10-16	Buckwheat	5	0.5598	NA	NA
2015-10-16	Buckwheat	5	0.8011	NA	NA
2015-10-16	Buckwheat	5	0.5088	NA	NA
2015-10-16	Buckwheat	5	0.8995	NA	NA
2015-10-13	Buckwheat	6	0.4256	0.1341	0.1948
2015-10-13	Buckwheat	6	0.614	0.1705	0.0909
2015-10-13	Buckwheat	6	0.6234	0.1743	0.1039
2015-10-13	Buckwheat	6	NA	0.1753	0.2384
2015-10-13	Buckwheat	6	NA	0.2359	0.1689
2015-10-13	Buckwheat	6	NA	0.2216	0.1419
2015-10-13	Buckwheat	6	NA	0.1776	0.1437
2015-10-13	Buckwheat	6	NA	0.2429	0.1645
2015-10-13	Buckwheat	6	NA	0.2249	0.1227
2015-10-13	Buckwheat	6	NA	0.1512	0.1388
2015-10-13	Buckwheat	6	NA	0.1746	0.1925
2015-10-13	Buckwheat	6	NA	0.2109	0.1107
2015-10-13	Buckwheat	6	NA	0.2158	0.1031
2015-10-13	Buckwheat	6	NA	0.2789	0.1133
2015-10-13	Buckwheat	6	NA	0.1919	0.137
2015-10-13	Buckwheat	6	NA	0.2122	0.1806
2015-10-13	Buckwheat	6	NA	0.1818	0.1667
2015-10-13	Buckwheat	6	NA	0.2489	0.1577
2015-10-13	Buckwheat	6	NA	0.1373	0.0914
2015-10-13	Buckwheat	6	NA	0.167	0.2029
2015-10-13	Buckwheat	6	NA	0.1839	NA
2015-10-16	Buckwheat	7	0.6215	0.1376	0.1461
2015-10-16	Buckwheat	7	0.7135	0.1462	0.1903
2015-10-16	Buckwheat	7	0.7518	0.1435	0.1206
2015-10-16	Buckwheat	7	0.3927	0.1761	0.2705
2015-10-16	Buckwheat	7	NA	0.1431	0.2455
2015-10-16	Buckwheat	7	NA	0.143	0.1614
2015-10-16	Buckwheat	7	NA	0.2156	0.1443
2015-10-16	Buckwheat	7	NA	0.1899	0.1754
2015-10-16	Buckwheat	7	NA	0.1832	0.1958
2015-10-16	Buckwheat	7	NA	0.1634	0.1894
2015-10-16	Buckwheat	7	NA	0.1528	0.1436
2015-10-16	Buckwheat	7	NA	0.1539	0.103
2015-10-16	Buckwheat	7	NA	0.1681	0.1764
2015-10-16	Buckwheat	7	NA	0.177	0.1477
2015-10-16	Buckwheat	7	NA	0.1681	0.1428
2015-10-16	Buckwheat	7	NA	0.1822	0.1615
2015-10-16	Buckwheat	7	NA	0.1516	0.1226
2015-10-16	Buckwheat	7	NA	0.162	0.2298
2015-10-16	Buckwheat	7	NA	0.154	0.1778
2015-10-16	Buckwheat	7	NA	0.1558	0.1533
2015-09-24	Buckwheat	8	0.4372	0.1762	0.185
2015-09-24	Buckwheat	8	0.4028	NA	0.1487
2015-09-24	Buckwheat	8	0.4819	NA	0.0852
2015-09-24	Buckwheat	8	0.5459	NA	0.1228
2015-09-24	Buckwheat	8	0.5346	NA	0.2753
2015-09-24	Buckwheat	8	0.4283	NA	0.2172
2015-09-24	Buckwheat	8	0.5008	NA	0.2003
2015-09-24	Buckwheat	8	NA	NA	0.1718
2015-09-24	Buckwheat	8	NA	NA	0.1901
2015-09-24	Buckwheat	8	NA	NA	0.1952
2015-09-24	Buckwheat	8	NA	NA	0.1633
2015-09-24	Buckwheat	8	NA	NA	0.2078
2015-09-24	Buckwheat	8	NA	NA	0.3707
2015-09-24	Buckwheat	8	NA	NA	0.2622
2015-09-24	Buckwheat	8	NA	NA	0.1966
2015-09-24	Buckwheat	8	NA	NA	0.1708
2015-09-24	Buckwheat	8	NA	NA	0.1492
2015-09-24	Buckwheat	8	NA	NA	0.1153
2015-09-24	Buckwheat	8	NA	NA	0.2589
2015-09-24	Buckwheat	8	NA	NA	0.1965
2015-10-15	Buckwheat	9	0.636	0.1564	0.1347
2015-10-15	Buckwheat	9	0.5077	0.2134	0.1581
2015-10-15	Buckwheat	9	0.5526	0.1613	0.0891
2015-10-15	Buckwheat	9	0.6524	0.2063	0.1851
2015-10-15	Buckwheat	9	0.6171	0.1612	0.1842
2015-10-15	Buckwheat	9	0.4109	0.1929	0.107
2015-10-15	Buckwheat	9	0.6608	0.1345	0.1847
2015-10-15	Buckwheat	9	0.648	0.1237	0.1593
2015-10-15	Buckwheat	9	0.6528	0.2159	0.0852
2015-10-15	Buckwheat	9	0.5457	0.1774	0.3592
2015-10-15	Buckwheat	9	NA	0.1777	0.1567
2015-10-15	Buckwheat	9	NA	0.1924	0.1166
2015-10-15	Buckwheat	9	NA	0.2119	0.149
2015-10-15	Buckwheat	9	NA	0.2038	0.128
2015-10-15	Buckwheat	9	NA	0.1603	0.084
2015-10-15	Buckwheat	9	NA	0.1218	0.0751
2015-10-15	Buckwheat	9	NA	0.161	0.2327
2015-10-15	Buckwheat	9	NA	0.1487	0.1642
2015-10-15	Buckwheat	9	NA	0.1797	0.1007
2015-10-15	Buckwheat	9	NA	0.1971	0.194
2015-09-22	Buckwheat	10	0.782	NA	0.08
2015-09-22	Buckwheat	10	0.7067	NA	0.1766
2015-09-22	Buckwheat	10	0.744	NA	0.0649
2015-09-22	Buckwheat	10	0.7545	NA	0.0611
2015-09-22	Buckwheat	10	0.7411	NA	0.2114
2015-09-22	Buckwheat	10	NA	NA	0.2864
2015-09-22	Buckwheat	10	NA	NA	0.172
2015-09-22	Buckwheat	10	NA	NA	0.109
2015-09-22	Buckwheat	10	NA	NA	0.1028
2015-09-22	Buckwheat	10	NA	NA	0.1151
2015-09-22	Buckwheat	10	NA	NA	0.0287
2015-09-22	Buckwheat	10	NA	NA	0.1456
2015-09-22	Buckwheat	10	NA	NA	0.1642
2015-09-22	Buckwheat	10	NA	NA	0.026
2015-09-22	Buckwheat	10	NA	NA	0.0552
2015-09-22	Buckwheat	10	NA	NA	0.2125
2015-09-22	Buckwheat	10	NA	NA	0.1817
2015-09-22	Buckwheat	10	NA	NA	0.1073
2015-09-22	Buckwheat	10	NA	NA	0.2156
2015-09-22	Buckwheat	10	NA	NA	0.197
