# Supplementary material for: Comparison of buckwheat, red clover, and purple tansy as potential surrogate plants for use in semi-field pesticide risk assessments with Bombus impatiens
Source: PeerJ. 2016 Jul 14;4:e2228. doi: 10.7717/peerj.2228 (PMC4950535; doi:10.7717/peerj.2228)
Supplement: Supplemental Information 1 — Seeding details, date of first flower, and dates that Bombus impatiens colonies were introduced or removed from plots of each plant type (buckwheat, red clover, and purple tansy). [file peerj-04-2228-s001.xlsx]

## Sheet: Sheet1
Table S1. Seeding details, date of first flower, and dates that Bombus impatiens colonies were introduced or removed from plots of each plant type (buckwheat, red clover, and purple tansy).
Plant	Seeding Date	Seeding Rate (kg/ha)	Seed Cost (CDN/ha)	Seeding Method	Tilling	Fertilizer	Fertilzer Rate (tonnes/ha)	Date of First Open Flowers	Date Bombus impatiens Colonies Introduced	Date Bombus impatiens Colonies Removed
buckwheat	2015-06-22	32.1	105.16	broadcast	none	5.5-26-31-0-0-0-0-0-5.5-23.5Cl/11-53-0 MAP 0-0-62 White Potash Bulk Blend and 28-0-0 liquid 28%	0.193 (potash) and 0.212 (liquid)	2015-07-23	2015-07-28	2015-08-12
red clover	2015-05-19	17.7	90.64	broadcast	turbo tilled and packed	5.5-26-31-0-0-0-0-0-5.5-23.5Cl/11-53-0 MAP 0-0-62 White Potash Bulk Blend	0.289	2015-07-30	2015-08-06	2015-08-21
purple tansy	2015-06-22	33.6	735.88	broadcast	none	5.5-26-31-0-0-0-0-0-5.5-23.5Cl/11-53-0 MAP 0-0-62 White Potash Bulk Blend and 28-0-0 liquid 28%	0.193 (potash) and 0.212 (liquid)	2015-07-20	2015-07-23	2015-08-07
